# Supplementary material for: Diversity and efficacy of insect sampling methods in an urban tropical dry forest of the Colombian Caribbean
Source: PeerJ. 2025 Feb 26;13:e18262. doi: 10.7717/peerj.18262 (PMC11871896; doi:10.7717/peerj.18262)
Supplement: Supplemental Information 1 — Tab General contains all relevant information for morphospecies, taxonomic identification, abundances, traps and guilds. All other tabs are only used for analyses. [file peerj-13-18262-s001.xlsx]

## Sheet: General
Order	Morphospecies	Abundance	Trap	Method	Guild
Coleoptera	Uroxys_sp1	9	1	Pitfall	Sap
Coleoptera	Aphodiinae_sp1	1	1	Pitfall	Sap
Coleoptera	Ceratocanthidae_sp1	1	1	Pitfall	Sap
Coleoptera	cf_Trichillum_sp1	1	1	Pitfall	Sap
Coleoptera	Nitidulidae_sp1	1	1	Pitfall	Sap
Hymenoptera	Ectatoma_ruidum	4	1	Pitfall	Dep
Hymenoptera	Pachycondyla_harpax	3	1	Pitfall	Dep
Hymenoptera	Odontomachus_sp2	1	1	Pitfall	Dep
Hymenoptera	Pseudomyrmex_sp1	1	1	Pitfall	Omn
Coleoptera	Curculionidae_sp1	2	1	Pitfall	Xil_pe
Coleoptera	Curculionidae_sp2	2	1	Pitfall	Xil_pe
Coleoptera	Curculionidae_sp3	1	1	Pitfall	Xil_pe
Orthoptera	Gryllidae_sp2	1	1	Pitfall	Omn
Hymenoptera	Temnothorax_sp1	1	1	Pitfall	Omn
Coleoptera	Tenebrionidae_sp1	4	1	Pitfall	Omn
Coleoptera	Tenebrionidae_sp2	2	1	Pitfall	Omn
Orthoptera	Orthoptero_sp1	1	2	Pitfall	Indet
Hymenoptera	Pachycondyla_harpax	1	2	Pitfall	Dep
Hymenoptera	Ectatoma_ruidum	1	2	Pitfall	Dep
Coleoptera	Nitidulidae_sp5	2	2	Pitfall	Sap
Zygentoma	Nicoletiidae_sp1	1	2	Pitfall	Omn
Hemiptera	Lygaeidae_sp3	1	2	Pitfall	F_Sav
Coleoptera	Chrysomelidae_sp1	1	2	Pitfall	F_Mas
Hymenoptera	Pompilidae_sp1	1	2	Pitfall	Dep
Coleoptera	Curculionidae_sp15	1	2	Pitfall	Xil_pe
Diptera	Muscidae_sp1	1	2	Pitfall	Sap
Hymenoptera	Rogeria_sp1	1	2	Pitfall	Omn
Coleoptera	Tenebrionidae_sp2	2	2	Pitfall	Omn
Hemiptera	Cicadellidae_sp1	1	2	Pitfall	F_Sav
Coleoptera	Scydmaenidae_sp1	1	2	Pitfall	Dep
Coleoptera	Nitidulidae_sp1	1	2	Pitfall	Sap
Coleoptera	Nitidulidae_sp2	1	2	Pitfall	Sap
Hymenoptera	Mutillidae_sp3	1	2	Pitfall	Par
Hymenoptera	Formicidae_sp8	1	3	Pitfall	F_Mas
Hymenoptera	Monomorium_sp1	1	3	Pitfall	Sap
Diptera	Phoridae_sp1	5	3	Pitfall	Sap
Hymenoptera	Pachycondyla_harpax	1	3	Pitfall	Dep
Hymenoptera	Ectatoma_ruidum	4	3	Pitfall	Dep
Hymenoptera	Pachycondyla_harpax	1	3	Pitfall	Dep
Hymenoptera	Odontomachus_sp2	7	3	Pitfall	Dep
Hemiptera	Cydnidae_sp1	1	3	Pitfall	F_Sav
Coleoptera	cf_Trichillum_sp1	40	3	Pitfall	Sap
Coleoptera	Canthon_sp1	21	3	Pitfall	Sap
Coleoptera	Uroxys_sp1	89	3	Pitfall	Sap
Collembola	Isotomidae_sp1	1	3	Pitfall	Sap
Blattodea	Blattellidae_sp1	1	3	Pitfall	Omn
Hymenoptera	Camponotus_sp7	1	3	Pitfall	Nec/Pol
Hymenoptera	Pseudomyrmex_sp1	1	3	Pitfall	Omn
Diptera	Chloropidae_sp1	1	3	Pitfall	F_Mas
Diptera	Phoridae_sp2	1	3	Pitfall	Sap
Diptera	Phoridae_sp3	1	3	Pitfall	Sap
Diptera	Piophilidae_sp1	1	3	Pitfall	Sap
Coleoptera	Staphylinidae_sp1	1	3	Pitfall	Dep
Diptera	Mycetophilidae_sp1	1	3	Pitfall	Mico
Coleoptera	Silvanidae_sp1	1	3	Pitfall	Mico
Coleoptera	Uroxys_sp1	95	4	Pitfall	Sap
Hemiptera	Cydnidae_sp1	3	4	Pitfall	F_Sav
Coleoptera	Tenebrionidae_sp2	3	4	Pitfall	Omn
Coleoptera	Silvanidae_sp1	1	4	Pitfall	Mico
Coleoptera	Nitidulidae_sp5	1	4	Pitfall	Sap
Coleoptera	Nitidulidae_sp2	24	4	Pitfall	Sap
Coleoptera	Tenebrionidae_sp1	4	4	Pitfall	Omn
Hymenoptera	Ectatoma_ruidum	22	4	Pitfall	Dep
Hymenoptera	Pachycondyla_harpax	1	4	Pitfall	Dep
Hymenoptera	Odontomachus_sp2	1	4	Pitfall	Dep
Coleoptera	Canthon_sp1	54	4	Pitfall	Sap
Coleoptera	cf_Trichillum_sp1	80	4	Pitfall	Sap
Coleoptera	Onthophagus_sp2	2	4	Pitfall	Sap
Hymenoptera	Dolichoderus_sp1	1	4	Pitfall	Sap
Coleoptera	Bolboceratinae_sp1	1	4	Pitfall	Sap
Coleoptera	Uroxys_sp2	1	4	Pitfall	Sap
Coleoptera	Tenebrionidae_sp4	1	4	Pitfall	Omn
Coleoptera	Tenebrionidae_sp5	1	4	Pitfall	Omn
Hemiptera	Delphacidae_sp1	1	4	Pitfall	F_Sav
Hymenoptera	Odontomachus_sp3	1	4	Pitfall	Dep
Coleoptera	Chrysomelidae_sp2	1	4	Pitfall	F_Mas
Coleoptera	Onthophagus_sp1	1	4	Pitfall	Sap
Hymenoptera	Mutillidae_sp1	2	4	Pitfall	Par
Coleoptera	Staphylinidae_sp2	2	4	Pitfall	Dep
Coleoptera	Histeridae_sp1	2	4	Pitfall	Dep
Blattodea	Blattellidae_sp2	2	4	Pitfall	Omn
Blattodea	Blattellidae_sp3	1	4	Pitfall	Omn
Hemiptera	Cydnidae_sp1	1	5	Pitfall	F_Sav
Coleoptera	Ceratocanthidae_sp1	1	5	Pitfall	Sap
Coleoptera	Nitidulidae_sp2	1	5	Pitfall	Sap
Coleoptera	Canthon_sp1	1	5	Pitfall	Sap
Coleoptera	Uroxys_sp1	2	5	Pitfall	Sap
Hymenoptera	Odontomachus_sp2	2	5	Pitfall	Dep
Hymenoptera	Pachycondyla_harpax	1	5	Pitfall	Dep
Hymenoptera	Ectatoma_ruidum	5	5	Pitfall	Dep
Coleoptera	Curculionidae_sp1	2	5	Pitfall	Xil_pe
Coleoptera	Curculionidae_sp2	1	5	Pitfall	Xil_pe
Coleoptera	Curculionidae_sp5	1	5	Pitfall	Xil_pe
Coleoptera	Tenebrionidae_sp1	8	5	Pitfall	Omn
Hymenoptera	Pseudomyrmex_sp1	1	5	Pitfall	Omn
Hymenoptera	Acromyrmex_sp1	1	5	Pitfall	F_Mas
Blattodea	Blattellidae_sp2	1	5	Pitfall	Omn
Coleoptera	Staphylinidae_sp3	1	5	Pitfall	Dep
Coleoptera	Curculionidae_sp4	1	5	Pitfall	Xil_pe
Coleoptera	Canthidium_sp1	1	5	Pitfall	Sap
Hemiptera	Cydnidae_sp1	1	5	Pitfall	F_Sav
Coleoptera	Tenebrionidae_sp6	1	5	Pitfall	Omn
Hymenoptera	Camponotus_sp4	1	5	Pitfall	F_Mas
Coleoptera	Canthon_sp2	1	5	Pitfall	Sap
Blattodea	Blattidae_sp1	1	5	Pitfall	Omn
Coleoptera	Uroxys_sp3	1	6	Pitfall	Sap
Hymenoptera	Pachycondyla_harpax	1	6	Pitfall	Dep
Hymenoptera	Solenopsis_sp1	15	6	Pitfall	Omn
Hymenoptera	Ectatoma_ruidum	4	6	Pitfall	Dep
Hymenoptera	Cramatogaster_sp1	1	6	Pitfall	Omn
Coleoptera	Canthon_sp1	5	6	Pitfall	Sap
Coleoptera	Uroxys_sp1	11	6	Pitfall	Sap
Coleoptera	cf_Trichillum_sp1	1	6	Pitfall	Sap
Hymenoptera	Acromyrmex_sp1	2	6	Pitfall	F_Mas
Hymenoptera	Cephalotes_sp17	1	6	Pitfall	F_Mas
Coleoptera	Silvanidae_sp1	1	6	Pitfall	Mico
Coleoptera	Tenebrionidae_sp2	1	6	Pitfall	Omn
Coleoptera	Tenebrionidae_sp1	2	6	Pitfall	Omn
Hymenoptera	Odontomachus_sp3	1	6	Pitfall	Dep
Collembola	Isotomidae_sp2	2	6	Pitfall	Sap
Coleoptera	Nitidulidae_sp2	2	6	Pitfall	Sap
Embioptera	Embioptera_sp1	1	6	Pitfall	F_Mas
Coleoptera	Staphylinidae_sp2	1	6	Pitfall	Dep
Hemiptera	Aradidae_sp1	2	6	Pitfall	Sap
Hymenoptera	Acromyrmex_sp1	1	7	Pitfall	F_Mas
Hymenoptera	Solenopsis_sp1	47	7	Pitfall	Omn
Hymenoptera	Brachymyrmex_sp1	5	7	Pitfall	Nec/Pol
Hymenoptera	Pheidole_sp1	5	7	Pitfall	Omn
Hymenoptera	Formicidae_sp21	1	7	Pitfall	F_Mas
Hymenoptera	Camponotus_sp7	1	7	Pitfall	Nec/Pol
Hymenoptera	Ectatoma_ruidum	10	7	Pitfall	Dep
Coleoptera	Tenebrionidae_sp4	2	7	Pitfall	Omn
Coleoptera	Tenebrionidae_sp1	21	7	Pitfall	Omn
Coleoptera	Tenebrionidae_sp6	3	7	Pitfall	Omn
Coleoptera	Tenebrionidae_sp2	2	7	Pitfall	Omn
Coleoptera	Chrysomelidae_sp3	1	7	Pitfall	F_Mas
Coleoptera	Tenebrionidae_sp7	1	7	Pitfall	Omn
Coleoptera	Canthon_sp1	1	7	Pitfall	Sap
Coleoptera	cf_Trichillum_sp1	1	7	Pitfall	Sap
Hymenoptera	Odontomachus_sp3	1	7	Pitfall	Dep
Coleoptera	Uroxys_sp1	5	7	Pitfall	Sap
Coleoptera	Carabidae_sp1	1	7	Pitfall	Dep
Hemiptera	Aradidae_sp1	1	7	Pitfall	Sap
Coleoptera	Curculionidae_sp5	1	7	Pitfall	Xil_pe
Coleoptera	Curculionidae_sp3	1	7	Pitfall	Xil_pe
Coleoptera	Curculionidae_sp1	1	7	Pitfall	Xil_pe
Coleoptera	Scydmaenidae_sp1	1	7	Pitfall	Dep
Coleoptera	Staphylinidae_sp4	1	7	Pitfall	Dep
Hymenoptera	Ectatoma_ruidum	54	8	Pitfall	Dep
Hymenoptera	Apis_sp1	1	8	Pitfall	Nec/Pol
Hemiptera	Cydnidae_sp1	1	8	Pitfall	F_Sav
Coleoptera	Tenebrionidae_sp1	2	8	Pitfall	Omn
Coleoptera	Tenebrionidae_sp4	1	8	Pitfall	Omn
Hemiptera	Aradidae_sp1	4	8	Pitfall	Sap
Coleoptera	Nitidulidae_sp5	1	8	Pitfall	Sap
Coleoptera	Tenebrionidae_sp2	1	8	Pitfall	Omn
Coleoptera	Tenebrionidae_sp2	5	8	Pitfall	Omn
Coleoptera	Elateridae_sp1	1	8	Pitfall	F_Mas
Coleoptera	Staphylinidae_sp2	1	8	Pitfall	Dep
Hymenoptera	Cramatogaster_sp1	2	8	Pitfall	Omn
Hymenoptera	Mycetarotes_sp1	6	8	Pitfall	F_Mas
Coleoptera	Scydmaenidae_sp1	1	8	Pitfall	Dep
Coleoptera	Nitidulidae_sp2	6	8	Pitfall	Sap
Coleoptera	Curculionidae_sp3	1	8	Pitfall	Xil_pe
Hymenoptera	Ectatoma_ruidum	11	9	Pitfall	Dep
Coleoptera	Tenebrionidae_sp2	5	9	Pitfall	Omn
Coleoptera	Nitidulidae_sp2	4	9	Pitfall	Sap
Coleoptera	Staphylinidae_sp5	1	9	Pitfall	Dep
Coleoptera	Silvanidae_sp1	2	9	Pitfall	Mico
Hymenoptera	Camponotus_atriceps	1	9	Pitfall	Nec/Pol
Coleoptera	Curculionidae_sp5	5	9	Pitfall	Xil_pe
Coleoptera	Curculionidae_sp6	1	9	Pitfall	Xil_pe
Coleoptera	Curculionidae_sp7	1	9	Pitfall	Xil_pe
Hymenoptera	Mycetarotes_sp1	2	9	Pitfall	F_Mas
Hymenoptera	Odontomachus_sp3	2	9	Pitfall	Dep
Hymenoptera	Cephalotes_sp3	2	9	Pitfall	Nec/Pol
Hymenoptera	Mycetarotes_sp1	7	9	Pitfall	F_Mas
Hymenoptera	Ichneumonidae_sp1	1	9	Pitfall	Par
Hymenoptera	Platygastroidea_sp1	1	5	Malaise	Par
Hymenoptera	Braconidae_sp1	12	5	Malaise	Par
Orthoptera	Tettigonidae_sp2	2	5	Malaise	F_Mas
Hymenoptera	Braconidae_sp2	2	5	Malaise	Par
Hemiptera	Cicadellidae_sp2	2	5	Malaise	F_Sav
Coleoptera	Anobiidae_sp1	6	5	Malaise	Xil_pe
Coleoptera	Anobiidae_sp3	1	5	Malaise	Xil_pe
Coleoptera	Coccinellidae_sp1	1	5	Malaise	Dep
Coleoptera	Coccinellidae_sp2	1	5	Malaise	Dep
Coleoptera	Cerambycidae_sp1	1	5	Malaise	F_Mas
Diptera	Lauxaniidae_sp1	1	5	Malaise	Sap
Hymenoptera	Proctotrupoidea_sp1	5	5	Malaise	Par
Hemiptera	Cicadellidae_sp3	2	5	Malaise	F_Sav
Hemiptera	Cicadellidae_sp4	3	5	Malaise	F_Sav
Diptera	Sphaeroceridae_sp1	2	5	Malaise	Sap
Diptera	Sciaridae_sp1	1	5	Malaise	Sap
Coleoptera	Cerambycidae_sp1	1	5	Malaise	F_Mas
Diptera	Chironomidae_sp1	1	5	Malaise	Sap
Hymenoptera	Chrysidoidea_sp3	1	5	Malaise	Par
Hymenoptera	Chalcidoidea_sp1	1	5	Malaise	Par
Diptera	Muscidae_sp2	1	5	Malaise	Sap
Coleoptera	Carabidae_sp2	1	5	Malaise	Dep
Hymenoptera	Evaniidae_sp1	1	5	Malaise	Par
Coleoptera	Elateridae_sp3	1	5	Malaise	F_Mas
Coleoptera	Cleridae_sp3	2	5	Malaise	Dep
Diptera	Piophilidae_sp2	2	5	Malaise	Sap
Diptera	Chloropidae_sp2	8	5	Malaise	F_Mas
Diptera	Drosophilidae_sp1	12	5	Malaise	Sap
Hymenoptera	Chrysidoidea_sp2	3	5	Malaise	Par
Hymenoptera	Proctotrupoidea_sp2	1	5	Malaise	Par
Diptera	Piophilidae_sp3	1	5	Malaise	Sap
Diptera	Agromyzidae_sp1	1	5	Malaise	F_Aga
Diptera	Milichiidae_sp1	2	5	Malaise	Sap
Hymenoptera	Ampulicidae_sp1	1	5	Malaise	Par
Hymenoptera	Camponotus_sp3	3	5	Malaise	Nec/Pol
Coleoptera	Silvanidae_sp2	1	5	Malaise	Mico
Diptera	Dolichopodidae_sp1	57	5	Malaise	Dep
Coleoptera	Scydmaenidae_sp1	1	5	Malaise	Dep
Diptera	Chloropidae_sp1	1	5	Malaise	F_Mas
Coleoptera	Cleridae_sp1	2	5	Malaise	Dep
Coleoptera	Pselaphidae_sp1	1	5	Malaise	Dep
Diptera	Curtonotidae_sp1	1	5	Malaise	Sap
Diptera	Dolichopodidae_sp2	1	5	Malaise	Dep
Diptera	Empididae_sp1	1	5	Malaise	Dep
Diptera	Phoridae_sp4	2	5	Malaise	Sap
Diptera	Muscidae_sp3	1	5	Malaise	Sap
Diptera	Muscidae_sp4	2	5	Malaise	Sap
Diptera	Calliphoridae_sp2	2	5	Malaise	Sap
Diptera	Muscidae_sp5	5	5	Malaise	Sap
Diptera	Mesembrinellidae_sp1	1	5	Malaise	Sap
Diptera	Clusiidae_sp1	1	5	Malaise	Sap
Diptera	Chloropidae_sp3	1	5	Malaise	F_Mas
Diptera	Mycetophilidae_sp2	1	5	Malaise	Mico
Diptera	Anthomyiidae_sp1	1	5	Malaise	Sap
Diptera	Ceratopogonidae_sp1	1	5	Malaise	Hem
Diptera	Canacidae_sp1	1	5	Malaise	Sap
Diptera	Dolichopodidae_sp3	1	5	Malaise	Dep
Diptera	Phoridae_sp5	2	5	Malaise	Sap
Diptera	Phoridae_sp6	2	5	Malaise	Sap
Diptera	Phoridae_sp7	1	5	Malaise	Sap
Diptera	Dolichopodidae_sp4	1	5	Malaise	Dep
Diptera	Dolichopodidae_sp5	1	5	Malaise	Dep
Diptera	Chloropidae_sp4	2	5	Malaise	F_Mas
Diptera	Ulidiidae_sp1	1	5	Malaise	Sap
Diptera	Sarcophagidae_sp1	4	5	Malaise	Sap
Diptera	Sarcophagidae_sp2	1	5	Malaise	Sap
Diptera	Sarcophagidae_sp3	1	5	Malaise	Sap
Diptera	Muscidae_sp6	1	5	Malaise	Sap
Diptera	Conopidae_sp1	1	5	Malaise	Nec/Pol
Diptera	Conopidae_sp2	1	5	Malaise	Nec/Pol
Diptera	Micropezidae_sp1	7	5	Malaise	Sap
Diptera	Micropezidae_sp2	1	5	Malaise	Sap
Diptera	Ropalomeridae_sp1	1	5	Malaise	Sap
Diptera	Asilidae_sp1	1	5	Malaise	Dep
Diptera	Piophilidae_sp1	30	5	Malaise	Sap
Hymenoptera	Chalcidoidea_sp2	1	5	Malaise	Par
Hymenoptera	Chalcidoidea_sp3	1	5	Malaise	Par
Hymenoptera	Chrysidoidea_sp1	1	5	Malaise	Par
Hymenoptera	Proctotrupoidea_sp3	3	5	Malaise	Par
Hymenoptera	Chrysidoidea_sp4	1	5	Malaise	Par
Hymenoptera	Cynipoidea_sp1	1	5	Malaise	F_Aga
Hymenoptera	Proctotrupoidea_sp6	1	5	Malaise	Par
Hymenoptera	Proctotrupoidea_sp4	1	5	Malaise	Par
Hymenoptera	Chrysidoidea_sp5	1	5	Malaise	Par
Hymenoptera	Chalcidoidea_sp3	1	5	Malaise	Par
Hymenoptera	Proctotrupoidea_sp5	1	5	Malaise	Par
Hymenoptera	Chrysidoidea_sp6	1	5	Malaise	Par
Hymenoptera	Sapygidae_sp1	1	5	Malaise	Par
Hymenoptera	Cephidae_sp1	1	5	Malaise	F_Mas
Hymenoptera	Crabronidae_sp1	3	5	Malaise	Dep
Hymenoptera	Eucharitidae_sp1	1	5	Malaise	Par
Hymenoptera	Crematogaster_sp2	1	5	Malaise	Omn
Hymenoptera	Tiphiidae_sp1	1	5	Malaise	Par
Hymenoptera	Pompilidae_sp5	2	5	Malaise	Dep
Hymenoptera	Chrysidinae_sp1	1	5	Malaise	Par
Hymenoptera	Apoidea_sp1	1	5	Malaise	Dep
Hymenoptera	Tiphiidae_sp2	1	5	Malaise	Par
Hymenoptera	Ichneumonidae_sp2	1	5	Malaise	Par
Hymenoptera	Vespidae_sp6	1	5	Malaise	Dep
Hymenoptera	Apidae_sp1	1	5	Malaise	Nec/Pol
Hymenoptera	Apidae_sp2	7	5	Malaise	Nec/Pol
Hymenoptera	Braconidae_sp3	11	5	Malaise	Par
Hymenoptera	Evaniidae_sp2	5	5	Malaise	Par
Hymenoptera	Ichneumonidae_sp1	5	5	Malaise	Par
Hymenoptera	Ichneumonidae_sp3	1	5	Malaise	Par
Hymenoptera	Colletidae_sp1	1	5	Malaise	Nec/Pol
Hymenoptera	Vespidea_sp7	3	5	Malaise	Dep
Hymenoptera	Vespidae_sp8	11	5	Malaise	Dep
Hymenoptera	Scoliidae_sp1	3	5	Malaise	Nec/Pol
Hymenoptera	Tiphiidae_sp3	1	5	Malaise	Par
Hymenoptera	Tiphiidae_sp15	1	5	Malaise	Par
Hymenoptera	Apoidea_sp2	1	5	Malaise	Dep
Hymenoptera	Bradynobaenidae_sp1	1	5	Malaise	Par
Hymenoptera	Vespidae_sp2	5	5	Malaise	Dep
Hymenoptera	Vespidae_sp3	2	5	Malaise	Dep
Hymenoptera	Dolichoderus_sp2	2	5	Malaise	Sap
Hymenoptera	Cramatogaster_sp1	22	5	Malaise	Omn
Hymenoptera	Pseudomyrmex_sp5	1	5	Malaise	Omn
Hymenoptera	Cephalotes_sp5	2	5	Malaise	Nec/Pol
Hymenoptera	Cephalotes_sp3	8	5	Malaise	Nec/Pol
Hymenoptera	Cephalotes_sp4	1	5	Malaise	Nec/Pol
Hymenoptera	Camponotus_sp7	2	5	Malaise	Nec/Pol
Hymenoptera	Camponotus_sp6	21	5	Malaise	Nec/Pol
Hymenoptera	Pseudomyrmex_sp2	9	5	Malaise	Omn
Hymenoptera	Cephalotes_sp2	1	5	Malaise	Nec/Pol
Coleoptera	Nitidulidae_sp3	1	5	Malaise	Sap
Coleoptera	Chrysomelidae_sp3	2	5	Malaise	F_Mas
Coleoptera	Mordellidae_sp1	2	5	Malaise	F_Mas
Coleoptera	Bruchidae_sp2	13	5	Malaise	Xil_pe
Coleoptera	Chrysomelidae_sp5	3	5	Malaise	F_Mas
Coleoptera	Cleridae_sp2	7	5	Malaise	Dep
Coleoptera	Chrysomelidae_sp6	1	5	Malaise	F_Mas
Coleoptera	Cleridae_sp5	1	5	Malaise	Dep
Coleoptera	Nitidulidae_sp5	3	5	Malaise	Sap
Coleoptera	Nitidulidae_sp2	3	5	Malaise	Sap
Coleoptera	Coccinellidae_sp3	1	5	Malaise	Dep
Coleoptera	Coccinellidae_sp4	1	5	Malaise	Dep
Coleoptera	Tenebrionidae_sp8	1	5	Malaise	Omn
Coleoptera	Anobiidae_sp1	1	5	Malaise	Xil_pe
Coleoptera	Elateridae_sp3	2	5	Malaise	F_Mas
Coleoptera	Coccinellidae_sp5	1	5	Malaise	Dep
Coleoptera	Meloidae_sp1	1	5	Malaise	F_Mas
Coleoptera	Mordellidae_sp5	6	5	Malaise	F_Mas
Coleoptera	Tenebrionidae_sp9	2	5	Malaise	Omn
Coleoptera	Curculionidae_sp9	1	5	Malaise	Xil_pe
Coleoptera	Staphylinidae_sp6	1	5	Malaise	Dep
Coleoptera	Staphylinidae_sp7	1	5	Malaise	Dep
Coleoptera	Staphylinidae_sp8	1	5	Malaise	Dep
Coleoptera	Staphylinidae_sp9	2	5	Malaise	Dep
Coleoptera	Staphylinidae_sp3	1	5	Malaise	Dep
Coleoptera	Staphylinidae_sp10	2	5	Malaise	Dep
Coleoptera	Curculionidae_sp10	4	5	Malaise	Xil_pe
Coleoptera	Phengodidae_sp1	1	5	Malaise	Dep
Hemiptera	Pentatomidae_sp1	1	5	Malaise	F_Sav
Hemiptera	Membracidae_sp1	1	5	Malaise	F_Sav
Hemiptera	Membracidae_sp2	1	5	Malaise	F_Sav
Hemiptera	Cicadellidae_sp5	2	5	Malaise	F_Sav
Hemiptera	Cicadellidae_sp6	2	5	Malaise	F_Sav
Hemiptera	Cydnidae_sp2	1	5	Malaise	F_Sav
Mantodea	Thespidae_sp1	1	5	Malaise	Dep
Diptera	Asilidae_sp2	2	5	Malaise	Dep
Hymenoptera	Chrysidoidea_sp7	1	5	Malaise	Par
Hymenoptera	Chrysidoidea_sp11	1	5	Malaise	Par
Hymenoptera	Cephalotes_sp4	19	5	Malaise	Nec/Pol
Coleoptera	Cerambycidae_sp2	1	5	Malaise	F_Mas
Diptera	Dolichopodidae_sp4	2	2	Malaise	Dep
Diptera	Chloropidae_sp2	1	2	Malaise	F_Mas
Diptera	Sphaeroceridae_sp2	1	2	Malaise	Sap
Diptera	Chironomidae_sp2	1	2	Malaise	Sap
Diptera	Lauxaniidae_sp3	2	2	Malaise	Sap
Orthoptera	Tettigonidae_sp2	1	2	Malaise	F_Mas
Diptera	Sphaeroceridae_sp3	1	2	Malaise	Sap
Diptera	Drosophilidae_sp1	2	2	Malaise	Sap
Diptera	Curtonotidae_sp2	1	2	Malaise	Sap
Diptera	Lonchaeidae_sp1	1	2	Malaise	Sap
Diptera	Tabanidae_sp1	1	2	Malaise	Hem
Diptera	Dolichopodidae_sp1	6	2	Malaise	Dep
Diptera	Lauxaniidae_sp2	1	2	Malaise	Sap
Diptera	Asilidae_sp1	1	2	Malaise	Dep
Diptera	Stratiomyidae_sp1	1	2	Malaise	Sap
Diptera	Piophilidae_sp1	13	2	Malaise	Sap
Diptera	Micropezidae_sp1	4	2	Malaise	Sap
Diptera	Anisopodidae_sp1	1	2	Malaise	Sap
Diptera	Phoridae_sp1	8	2	Malaise	Sap
Diptera	Sphaeroceridae_sp1	1	2	Malaise	Sap
Diptera	Calliphoridae_sp1	1	2	Malaise	Sap
Diptera	Muscidae_sp8	1	2	Malaise	Sap
Diptera	Sarcophagidae_sp1	3	2	Malaise	Sap
Diptera	Sarcophagidae_sp3	1	2	Malaise	Sap
Hymenoptera	Chrysidoidea_sp8	1	2	Malaise	Par
Hymenoptera	Chrysidoidea_sp9	1	2	Malaise	Par
Hymenoptera	Chrysidoidea_sp10	1	2	Malaise	Par
Hymenoptera	Platygastroidea_sp2	1	2	Malaise	Par
Hymenoptera	Chrysidoidea_sp2	1	2	Malaise	Par
Hymenoptera	Evaniidae_sp2	1	2	Malaise	Par
Hymenoptera	Evaniidae_sp3	2	2	Malaise	Par
Hymenoptera	Chalcidoidea_sp5	1	2	Malaise	Par
Hymenoptera	Vespidae_sp8	3	2	Malaise	Dep
Hymenoptera	Braconidae_sp1	6	2	Malaise	Par
Hymenoptera	Braconidae_sp2	1	2	Malaise	Par
Hymenoptera	Tiphiidae_sp4	2	2	Malaise	Par
Hymenoptera	Ichneumonidae_sp1	4	2	Malaise	Par
Hymenoptera	Crematogaster_sp2	4	2	Malaise	Omn
Hymenoptera	Scoliidae_sp1	2	2	Malaise	Nec/Pol
Hymenoptera	Tiphiidae_sp4	1	2	Malaise	Par
Hymenoptera	Apidae_sp1	1	2	Malaise	Nec/Pol
Hymenoptera	Vespidae_sp3	2	2	Malaise	Dep
Hymenoptera	Pseudomyrmex_sp2	2	2	Malaise	Omn
Hymenoptera	Monomorium_sp1	47	2	Malaise	Sap
Hymenoptera	Pseudomyrmex_sp4	9	2	Malaise	Omn
Hymenoptera	Pseudomyrmex_sp1	1	2	Malaise	Omn
Hymenoptera	Camponotus_sp4	1	2	Malaise	Omn
Hymenoptera	Cephalotes_sp4	2	2	Malaise	Nec/Pol
Hymenoptera	Vespidae_sp12	1	2	Malaise	Dep
Coleoptera	Mordellidae_sp5	15	2	Malaise	F_Mas
Coleoptera	Tenebrionidae_sp10	1	2	Malaise	Omn
Coleoptera	Bruchidae_sp2	3	2	Malaise	Xil_pe
Coleoptera	Uroxys_sp1	3	2	Malaise	Sap
Coleoptera	Erotylidae_sp1	1	2	Malaise	Mico
Coleoptera	Elateridae_sp3	1	2	Malaise	F_Mas
Coleoptera	Elateridae_sp3	1	2	Malaise	F_Mas
Coleoptera	Chrysomelidae_sp6	2	2	Malaise	F_Mas
Coleoptera	Meloidae_sp2	1	2	Malaise	F_Mas
Coleoptera	Cleridae_sp3	3	2	Malaise	Dep
Coleoptera	Coccinellidae_sp4	3	2	Malaise	Dep
Coleoptera	Chrysomelidae_sp5	1	2	Malaise	F_Mas
Coleoptera	Nitidulidae_sp5	1	2	Malaise	Sap
Coleoptera	Cleridae_sp1	1	2	Malaise	Dep
Coleoptera	Nitidulidae_sp2	1	2	Malaise	Sap
Coleoptera	Mordellidae_sp2	1	2	Malaise	F_Mas
Coleoptera	Tenebrionidae_sp9	5	2	Malaise	Omn
Coleoptera	Chrysomelidae_sp3	20	2	Malaise	F_Mas
Coleoptera	Curculionidae_sp11	1	2	Malaise	Xil_pe
Coleoptera	Curculionidae_sp5	2	2	Malaise	Xil_pe
Coleoptera	Staphylinidae_sp8	1	2	Malaise	Dep
Coleoptera	Scydmaenidae_sp1	2	2	Malaise	Dep
Coleoptera	Coccinellidae_sp9	1	2	Malaise	Dep
Coleoptera	Corylophidae_sp1	1	2	Malaise	Mico
Coleoptera	Anobiidae_sp3	1	2	Malaise	Xil_pe
Diptera	Psychodidae_sp1	1	2	Malaise	Sap
Hemiptera	Cydnidae_sp1	1	2	Malaise	F_Sav
Blattodea	Blattellidae_sp3	1	2	Malaise	Omn
Hemiptera	Cicadellidae_sp7	1	2	Malaise	F_Sav
Hymenoptera	Braconidae_sp5	1	2	Malaise	Par
Diptera	Chloropidae_sp5	1	4	Malaise	F_Mas
Diptera	Chloropidae_sp1	2	4	Malaise	F_Mas
Orthoptera	Tettigonidae_sp2	1	4	Malaise	F_Mas
Diptera	Dolichopodidae_sp6	2	4	Malaise	Dep
Diptera	Curtonotidae_sp3	2	4	Malaise	Sap
Diptera	Mycetophilidae_sp2	5	4	Malaise	Mico
Diptera	Chironomidae_sp1	1	4	Malaise	Sap
Diptera	Drosophilidae_sp2	1	4	Malaise	Sap
Diptera	Lauxaniidae_sp3	1	4	Malaise	Sap
Diptera	Chamaemyiidae_sp2	3	4	Malaise	Dep
Diptera	Asilidae_sp3	1	4	Malaise	Dep
Diptera	Mesembrinellidae_sp1	1	4	Malaise	Sap
Diptera	Micropezidae_sp2	1	4	Malaise	Sap
Diptera	Dolichopodidae_sp1	2	4	Malaise	Dep
Diptera	Dolichopodidae_sp3	2	4	Malaise	Dep
Diptera	Dolichopodidae_sp4	2	4	Malaise	Dep
Diptera	Muscidae_sp9	1	4	Malaise	Sap
Diptera	Aslidae_sp4	1	4	Malaise	Dep
Diptera	Asilidae_sp2	1	4	Malaise	Dep
Diptera	Aslidae_sp5	1	4	Malaise	Dep
Diptera	Stratiomyidae_sp2	1	4	Malaise	Sap
Diptera	Piophilidae_sp1	36	4	Malaise	Sap
Diptera	Muscidae_sp5	12	4	Malaise	Sap
Diptera	Muscidae_sp7	1	4	Malaise	Sap
Diptera	Calliphoridae_sp1	1	4	Malaise	Sap
Diptera	Calliphoridae_sp2	1	4	Malaise	Sap
Diptera	Sarcophagidae_sp3	1	4	Malaise	Sap
Diptera	Phoridae_sp5	4	4	Malaise	Sap
Diptera	Tabanidae_sp1	8	4	Malaise	Hem
Hymenoptera	Vespidae_sp2	1	4	Malaise	Dep
Hymenoptera	Pompilidae_sp5	1	4	Malaise	Dep
Hymenoptera	Pompilidae_sp4	1	4	Malaise	Dep
Hymenoptera	Evaniidae_sp2	1	4	Malaise	Par
Hymenoptera	Vespidae_sp12	1	4	Malaise	Dep
Hymenoptera	Evaniidae_sp3	2	4	Malaise	Par
Hymenoptera	Scoliidae_sp1	1	4	Malaise	Nec/Pol
Hymenoptera	Tiphiidae_sp4	1	4	Malaise	Par
Hymenoptera	Mutillidae_sp2	1	4	Malaise	Par
Hymenoptera	Vespidae_sp3	5	4	Malaise	Dep
Hymenoptera	Braconidae_sp2	5	4	Malaise	Par
Hymenoptera	Apoidea_sp3	3	4	Malaise	Dep
Hymenoptera	Crematogaster_sp2	2	4	Malaise	Omn
Hymenoptera	Ichneumonidae_sp2	1	4	Malaise	Par
Hymenoptera	Chalcidoidea_sp6	1	4	Malaise	Par
Hymenoptera	Crabronidae_sp2	1	4	Malaise	Dep
Hymenoptera	Chrysidoidea_sp12	1	4	Malaise	Par
Hymenoptera	Chrysidoidea_sp2	10	4	Malaise	Par
Hymenoptera	Platygastroidea_sp3	1	4	Malaise	Par
Hymenoptera	Chalcidoidea_sp7	1	4	Malaise	Par
Hymenoptera	Chalcidoidea_sp8	1	4	Malaise	Par
Hymenoptera	Chalcidoidea_sp9	1	4	Malaise	Par
Hymenoptera	Chrysidoidea_sp1	1	4	Malaise	Par
Hymenoptera	Chrysidoidea_sp13	1	4	Malaise	Par
Hymenoptera	Chrysidoidea_sp14	1	4	Malaise	Par
Hymenoptera	Chrysidoidea_sp4	1	4	Malaise	Par
Hymenoptera	Chrysidoidea_sp15	1	4	Malaise	Par
Hymenoptera	Chrysidoidea_sp16	1	4	Malaise	Par
Hymenoptera	Braconidae_sp6	1	4	Malaise	Par
Hymenoptera	Pseudomyrmex_sp6	4	4	Malaise	Omn
Hymenoptera	Pseudomyrmex_sp38	5	4	Malaise	Omn
Hymenoptera	Camponotus_sp2	1	4	Malaise	Nec/Pol
Hymenoptera	Cramatogaster_sp1	1	4	Malaise	Omn
Hymenoptera	Cephalotes_sp3	4	4	Malaise	Nec/Pol
Hymenoptera	Camponotus_sp3	2	4	Malaise	Nec/Pol
Hymenoptera	Camponotus_sp6	3	4	Malaise	Nec/Pol
Hymenoptera	Camponotus_sp7	7	4	Malaise	Nec/Pol
Coleoptera	Mordellidae_sp5	5	4	Malaise	F_Mas
Coleoptera	Tenebrionidae_sp9	1	4	Malaise	Omn
Coleoptera	Tenebrionidae_sp11	1	4	Malaise	Omn
Coleoptera	Tenebrionidae_sp12	1	4	Malaise	Omn
Coleoptera	Bruchidae_sp2	2	4	Malaise	Xil_pe
Coleoptera	Erotylidae_sp1	1	4	Malaise	Mico
Coleoptera	Melolonthidae_sp1	1	4	Malaise	F_Mas
Coleoptera	Tenebrionidae_sp13	6	4	Malaise	Omn
Coleoptera	Tenebrionidae_sp14	2	4	Malaise	Omn
Coleoptera	Tenebrionidae_sp8	2	4	Malaise	Omn
Coleoptera	Nitidulidae_sp5	7	4	Malaise	Sap
Coleoptera	Cleridae_sp3	7	4	Malaise	Dep
Coleoptera	Trogossitidae_sp2	1	4	Malaise	Dep
Coleoptera	Uroxys_sp1	1	4	Malaise	Sap
Coleoptera	Elateridae_sp3	2	4	Malaise	F_Mas
Coleoptera	Coccinellidae_sp4	1	4	Malaise	Dep
Coleoptera	Cassidinae_sp1	1	4	Malaise	F_Mas
Coleoptera	Cerambycidae_sp3	1	4	Malaise	F_Mas
Coleoptera	Chrysomelidae_sp2	40	4	Malaise	F_Mas
Coleoptera	Chrysomelidae_sp3	14	4	Malaise	F_Mas
Coleoptera	Cleridae_sp2	3	4	Malaise	Dep
Coleoptera	Phengodidae_sp1	1	4	Malaise	Dep
Coleoptera	Dermestidae_sp1	1	4	Malaise	Sap
Coleoptera	Chrysomelidae_sp7	6	4	Malaise	F_Mas
Coleoptera	Anobiidae_sp3	2	4	Malaise	Xil_pe
Coleoptera	Mordellidae_sp2	1	4	Malaise	F_Mas
Coleoptera	Bostrichidae_sp2	3	4	Malaise	Xil_pe
Coleoptera	Cleridae_sp5	3	4	Malaise	Dep
Coleoptera	Elateridae_sp3	3	4	Malaise	F_Mas
Coleoptera	Staphylinidae_sp1	3	4	Malaise	Dep
Coleoptera	Staphylinidae_sp6	1	4	Malaise	Dep
Coleoptera	Staphylinidae_sp7	1	4	Malaise	Dep
Coleoptera	Staphylinidae_sp10	1	4	Malaise	Dep
Coleoptera	Staphylinidae_sp11	2	4	Malaise	Dep
Coleoptera	Nitidulidae_sp4	1	4	Malaise	Sap
Coleoptera	Cerambycidae_sp5	2	4	Malaise	F_Mas
Coleoptera	Tenebrionidae_sp11	2	4	Malaise	Omn
Orthoptera	Gryllacrididae_sp1	1	4	Malaise	Omn
Hemiptera	Cicadellidae_sp4	1	4	Malaise	F_Sav
Hemiptera	Cicadellidae_sp2	1	4	Malaise	F_Sav
Hemiptera	Cicadellidae_sp8	1	4	Malaise	F_Sav
Hemiptera	Cercopidae_sp3	1	4	Malaise	F_Sav
Hemiptera	Cicadellidae_sp10	1	4	Malaise	F_Sav
Hemiptera	Cicadellidae_sp6	2	4	Malaise	F_Sav
Hemiptera	Cydnidae_sp1	1	4	Malaise	F_Sav
Hemiptera	Lygaeidae_sp1	1	4	Malaise	F_Sav
Neuroptera	Hemerobiidae_sp1	1	4	Malaise	Dep
Psocoptera	Psocoptera_sp1	1	4	Malaise	Omn
Psocoptera	Psocoptera_sp2	1	4	Malaise	Omn
Hymenoptera	Braconidae_sp4	1	4	Malaise	Par
Orthoptera	Tettigonidae_sp2	1	1	Malaise	F_Mas
Coleoptera	Mordellidae_sp5	7	1	Malaise	F_Mas
Coleoptera	Bostrichidae_sp2	1	1	Malaise	Xil_pe
Coleoptera	Melolonthidae_sp1	1	1	Malaise	F_Mas
Coleoptera	Erotylidae_sp1	1	1	Malaise	Mico
Coleoptera	Tenebrionidae_sp9	5	1	Malaise	Omn
Coleoptera	Tenebrionidae_sp11	1	1	Malaise	Omn
Coleoptera	Bruchidae_sp2	2	1	Malaise	Xil_pe
Coleoptera	Cleridae_sp3	5	1	Malaise	Dep
Coleoptera	Dermestidae_sp1	3	1	Malaise	Sap
Coleoptera	Elateridae_sp3	2	1	Malaise	F_Mas
Coleoptera	Elateridae_sp5	4	1	Malaise	F_Mas
Coleoptera	Coccinellidae_sp4	1	1	Malaise	Dep
Coleoptera	Curculionidae_sp5	2	1	Malaise	Xil_pe
Coleoptera	Tenebrionidae_sp8	1	1	Malaise	Omn
Coleoptera	Tenebrionidae_sp15	1	1	Malaise	Omn
Coleoptera	Anobiidae_sp3	3	1	Malaise	Xil_pe
Coleoptera	Chrysomelidae_sp3	1	1	Malaise	F_Mas
Coleoptera	Mordellidae_sp2	2	1	Malaise	F_Mas
Coleoptera	Mordellidae_sp3	1	1	Malaise	F_Mas
Coleoptera	Cleridae_sp5	1	1	Malaise	Dep
Coleoptera	Megalopodidae_sp1	1	1	Malaise	F_Mas
Coleoptera	Chrysomelidae_sp9	1	1	Malaise	F_Mas
Coleoptera	Trogossitidae_sp3	1	1	Malaise	Dep
Coleoptera	Staphylinidae_sp1	3	1	Malaise	Dep
Hemiptera	Delphacidae_sp2	1	1	Malaise	F_Sav
Coleoptera	Staphylinidae_sp2	1	1	Malaise	Dep
Coleoptera	Staphylinidae_sp9	1	1	Malaise	Dep
Coleoptera	Scydmaenidae_sp1	2	1	Malaise	Dep
Coleoptera	Bostrichidae_sp3	2	1	Malaise	Xil_pe
Coleoptera	Anobiidae_sp4	1	1	Malaise	Xil_pe
Coleoptera	Lathridiidae_sp1	2	1	Malaise	Mico
Coleoptera	Anthicidae_sp1	1	1	Malaise	Sap
Coleoptera	Curculionidae_sp12	1	1	Malaise	Xil_pe
Coleoptera	Cerambycidae_sp2	1	1	Malaise	F_Mas
Coleoptera	Bostrichidae_sp4	1	1	Malaise	Xil_pe
Hemiptera	Lygaeidae_sp1	1	1	Malaise	F_Sav
Diptera	Sciaridae_sp1	1	1	Malaise	sap
Diptera	Cecidomyiidae_sp1	1	1	Malaise	F_Mas
Diptera	Mycetophilidae_sp2	1	1	Malaise	Mico
Diptera	Psychodidae_sp3	1	1	Malaise	Sap
Diptera	Chironomidae_sp3	1	1	Malaise	Sap
Diptera	Lauxaniidae_sp3	1	1	Malaise	Sap
Diptera	Chloropidae_sp1	4	1	Malaise	F_Mas
Diptera	Chloropidae_sp2	1	1	Malaise	F_Mas
Diptera	Sphaeroceridae_sp4	1	1	Malaise	Sap
Diptera	Sphaeroceridae_sp5	1	1	Malaise	Sap
Diptera	Piophilidae_sp2	2	1	Malaise	Sap
Diptera	Dolichopodidae_sp1	1	1	Malaise	Dep
Diptera	Dolichopodidae_sp4	5	1	Malaise	Dep
Diptera	Phoridae_sp1	1	1	Malaise	Sap
Diptera	Phoridae_sp6	1	1	Malaise	Sap
Diptera	Empididae_sp2	2	1	Malaise	Dep
Diptera	Micropezidae_sp1	1	1	Malaise	Sap
Diptera	Stratiomyidae_sp3	1	1	Malaise	Sap
Diptera	Tabanidae_sp1	2	1	Malaise	Hem
Diptera	Piophilidae_sp1	5	1	Malaise	Sap
Diptera	Muscidae_sp7	1	1	Malaise	Sap
Diptera	Sarcophagidae_sp1	1	1	Malaise	Sap
Hymenoptera	Proctotrupoidea_sp1	1	1	Malaise	Par
Hymenoptera	Chalcidoidea_sp10	1	1	Malaise	Par
Hymenoptera	Chalcidoidea_sp11	1	1	Malaise	Par
Hymenoptera	Crematogaster_sp2	2	1	Malaise	Omn
Hymenoptera	Braconidae_sp5	2	1	Malaise	Par
Hymenoptera	Chrysidoidea_sp2	1	1	Malaise	Par
Hymenoptera	Chrysidoidea_sp8	2	1	Malaise	Par
Hymenoptera	Proctotrupoidea_sp5	1	1	Malaise	Par
Hymenoptera	Chrysidoidea_sp17	1	1	Malaise	Par
Hymenoptera	Mutillidae_sp2	2	1	Malaise	Par
Hymenoptera	Bradynobaenidae_sp1	2	1	Malaise	Par
Hymenoptera	Tiphiidae_sp4	3	1	Malaise	Par
Hymenoptera	Scoliidae_sp1	1	1	Malaise	Nec/Pol
Hymenoptera	Apoidea_sp4	2	1	Malaise	Dep
Hemiptera	Cicadellidae_sp11	2	1	Malaise	F_Sav
Hemiptera	Cicadellidae_sp12	1	1	Malaise	F_Sav
Hymenoptera	Cephalotes_sp3	3	3	fogging	Nec/Pol
Hymenoptera	Cephalotes_sp4	28	3	fogging	Nec/Pol
Hymenoptera	Camponotus_sp4	2	3	fogging	Omn
Hymenoptera	Pseudomyrmex_sp5	13	3	fogging	Omn
Hymenoptera	Dolichoderus_sp1	7	3	fogging	Sap
Hymenoptera	Cramatogaster_sp1	14	3	fogging	Omn
Hymenoptera	Monomorium_sp1	44	3	fogging	Sap
Hymenoptera	Cephalotes_sp3	23	1	fogging	Nec/Pol
Hymenoptera	Cephalotes_sp4	24	1	fogging	Nec/Pol
Hymenoptera	Pseudomyrmex_sp5	5	1	fogging	Omn
Hymenoptera	Dolichoderus_sp1	4	1	fogging	Sap
Hymenoptera	Cramatogaster_sp1	12	1	fogging	Omn
Hymenoptera	Monomorium_sp1	71	1	fogging	Sap
Hymenoptera	Cephalotes_sp3	6	4	fogging	Nec/Pol
Hymenoptera	Cephalotes_sp3	64	4	fogging	Nec/Pol
Hymenoptera	Dolichoderus_sp1	42	4	fogging	Sap
Hymenoptera	Pseudomyrmex_sp5	14	4	fogging	Omn
Hymenoptera	Cramatogaster_sp1	9	4	fogging	Omn
Hymenoptera	Monomorium_sp1	9	4	fogging	Sap
Hymenoptera	Strumigenys_sp1	1	4	fogging	Dep
Hymenoptera	Camponotus_sp2	1	4	fogging	Nec/Pol
Hymenoptera	Camponotus_sp4	1	4	fogging	Omn
Hymenoptera	Cephalotes_sp5	1	4	fogging	Nec/Pol
Hymenoptera	Dolichoderus_sp1	3	4	fogging	Sap
Hymenoptera	Cephalotes_sp3	10	2	fogging	Nec/Pol
Hymenoptera	Cephalotes_sp4	13	2	fogging	Nec/Pol
Hymenoptera	Camponotus_sp2	2	2	fogging	Nec/Pol
Hymenoptera	Dolichoderus_sp1	8	2	fogging	Sap
Hymenoptera	Pseudomyrmex_sp1	1	2	fogging	Omn
Hymenoptera	Cramatogaster_sp1	4	2	fogging	Omn
Hymenoptera	Monomorium_sp1	46	2	fogging	Sap
Hymenoptera	Ectatoma_ruidum	1	2	fogging	Dep
Hymenoptera	Camponotus_sp5	3	2	fogging	Nec/Pol
Coleoptera	Cerambycidae_sp4	1	3	fogging	F_Mas
Coleoptera	Cassidinae_sp2	1	3	fogging	F_Mas
Coleoptera	Chrysomelidae_sp3	29	3	fogging	F_Mas
Coleoptera	Bostrichidae_sp3	1	3	fogging	Xil_pe
Coleoptera	Bostrichidae_sp4	2	3	fogging	Xil_pe
Coleoptera	Curculionidae_sp11	1	3	fogging	Xil_pe
Coleoptera	Curculionidae_sp13	1	3	fogging	Xil_pe
Coleoptera	Curculionidae_sp14	1	3	fogging	Xil_pe
Coleoptera	Corylophidae_sp2	1	3	fogging	Mico
Coleoptera	Anobiidae_sp4	1	3	fogging	Xil_pe
Coleoptera	Chrysomelidae_sp10	1	3	fogging	F_Mas
Coleoptera	Dermestidae_sp2	1	3	fogging	Sap
Coleoptera	Lampyridae_sp1	1	3	fogging	Dep
Coleoptera	Buprestidae_sp1	1	3	fogging	Xil_pe
Coleoptera	Cerambycidae_sp6	1	3	fogging	F_Mas
Coleoptera	Chrysomelidae_sp3	38	1	fogging	F_Mas
Coleoptera	Curculionidae_sp11	1	1	fogging	Xil_pe
Coleoptera	Cerambycidae_sp4	1	1	fogging	F_Mas
Coleoptera	Chrysomelidae_sp5	2	1	fogging	F_Mas
Coleoptera	Curculionidae_sp13	2	1	fogging	Xil_pe
Coleoptera	Curculionidae_sp14	1	1	fogging	Xil_pe
Coleoptera	Anobiidae_sp3	1	1	fogging	Xil_pe
Coleoptera	Anobiidae_sp4	1	1	fogging	Xil_pe
Coleoptera	Coccinellidae_sp5	1	1	fogging	Dep
Coleoptera	Curculionidae_sp4	1	1	fogging	Xil_pe
Coleoptera	Chrysomelidae_sp3	35	4	fogging	F_Mas
Coleoptera	Dermestidae_sp1	1	4	fogging	Sap
Coleoptera	Histeridae_sp2	1	4	fogging	Dep
Coleoptera	Curculionidae_sp13	3	4	fogging	Xil_pe
Coleoptera	Anobiidae_sp3	2	4	fogging	Xil_pe
Coleoptera	Anobiidae_sp4	4	4	fogging	Xil_pe
Coleoptera	Coccinellidae_sp7	1	4	fogging	Dep
Coleoptera	Corylophidae_sp1	2	4	fogging	Mico
Coleoptera	Cassidinae_sp3	1	4	fogging	F_Mas
Coleoptera	Chrysomelidae_sp3	17	2	fogging	F_Mas
Coleoptera	Coccinellidae_sp8	1	2	fogging	Dep
Coleoptera	Anobiidae_sp4	1	2	fogging	Xil_pe
Coleoptera	Chrysomelidae_sp5	1	2	fogging	F_Mas
Mantodea	Thespidae_sp2	2	3	fogging	Dep
Mantodea	Mantidae_sp4	1	3	fogging	Dep
Hemiptera	Cicadellidae_sp9	9	3	fogging	F_Sav
Psocoptera	Psocoptera_sp2	7	3	fogging	Omn
Psocoptera	Psocoptera_sp11	15	3	fogging	Omn
Psocoptera	Psocoptera_sp10	1	3	fogging	Omn
Psocoptera	Psocoptera_sp9	1	3	fogging	Omn
Hemiptera	Miridae_sp3	1	3	fogging	F_Sav
Hemiptera	Reduvidae_sp2	1	3	fogging	Dep
Hemiptera	Dictyopharidae_sp1	1	3	fogging	F_Sav
Hemiptera	Delphacidae_sp1	1	3	fogging	F_Sav
Hemiptera	Tingidae_sp1	12	3	fogging	F_Sav
Hemiptera	Tingidae_sp2	2	3	fogging	F_Sav
Psocoptera	Psocoptera_sp8	1	3	fogging	Omn
Mantodea	Thespidae_sp2	3	1	fogging	Dep
Mantodea	Mantidae_sp4	1	1	fogging	Dep
Hemiptera	Membracidae_sp3	1	1	fogging	F_Sav
Psocoptera	Psocoptera_sp2	7	1	fogging	Omn
Psocoptera	Psocoptera_sp11	7	1	fogging	Omn
Psocoptera	Psocoptera_sp12	6	1	fogging	Omn
Psocoptera	Psocoptera_sp1	3	1	fogging	Omn
Psocoptera	Psocoptera_sp13	1	1	fogging	Omn
Hemiptera	Cicadellidae_sp9	7	1	fogging	F_Sav
Hemiptera	Miridae_sp5	2	1	fogging	F_Sav
Hemiptera	Tingidae_sp1	2	1	fogging	F_Sav
Hemiptera	Tingidae_sp2	2	1	fogging	F_Sav
Hemiptera	Delphacidae_sp1	2	1	fogging	F_Sav
Hemiptera	Homoptera_sp1	1	1	fogging	Indet
Psocoptera	Psocoptera_sp8	3	1	fogging	Omn
Hemiptera	Miridae_sp5	2	4	fogging	F_Sav
Psocoptera	Psocoptera_sp2	9	4	fogging	Omn
Psocoptera	Psocoptera_sp11	6	4	fogging	Omn
Psocoptera	Psocoptera_sp12	8	4	fogging	Omn
Hemiptera	Miridae_sp4	1	4	fogging	F_Sav
Hemiptera	Cicadellidae_sp9	3	4	fogging	F_Sav
Hemiptera	Tingidae_sp1	3	4	fogging	F_Sav
Hemiptera	Cicadellidae_sp9	1	4	fogging	F_Sav
Hemiptera	Cicadellidae_sp11	1	4	fogging	F_Sav
Hemiptera	Delphacidae_sp1	1	4	fogging	F_Sav
Psocoptera	Psocoptera_sp15	1	4	fogging	Omn
Hemiptera	Cicadellidae_sp13	1	4	fogging	F_Sav
Psocoptera	Psocoptera_sp8	2	4	fogging	Omn
Mantodea	Mantidae_sp3	1	4	fogging	Dep
Hemiptera	Tingidae_sp1	4	2	fogging	F_Sav
Hemiptera	Cicadellidae_sp9	5	2	fogging	F_Sav
Psocoptera	Psocoptera_sp2	3	2	fogging	Omn
Hemiptera	Tingidae_sp2	1	2	fogging	F_Sav
Psocoptera	Psocoptera_sp8	1	2	fogging	Omn
Psocoptera	Psocoptera_sp11	3	2	fogging	Omn
Hemiptera	Ploiariidae_sp1	1	2	fogging	Dep
Coleoptera	Tenebrionidae_sp1	31	10	Pitfall	Omn
Coleoptera	Tenebrionidae_sp9	1	10	Pitfall	Omn
Coleoptera	Curculionidae_sp1	2	10	Pitfall	Xil_pe
Coleoptera	Curculionidae_sp15	1	10	Pitfall	Xil_pe
Coleoptera	Curculionidae_sp5	1	10	Pitfall	Xil_pe
Coleoptera	Curculionidae_sp3	1	10	Pitfall	Xil_pe
Coleoptera	Nitidulidae_sp5	3	10	Pitfall	Sap
Coleoptera	Histeridae_sp1	1	10	Pitfall	Dep
Coleoptera	Bruchidae_sp2	1	10	Pitfall	Xil_pe
Coleoptera	Endomychidae_sp1	1	10	Pitfall	Mico
Coleoptera	Tenebrionidae_sp2	3	10	Pitfall	Omn
Coleoptera	Nitidulidae_sp2	4	10	Pitfall	Sap
Coleoptera	Tenebrionidae_sp1	27	11	Pitfall	Omn
Coleoptera	Tenebrionidae_sp5	1	11	Pitfall	Omn
Coleoptera	Curculionidae_sp1	2	11	Pitfall	Xil_pe
Coleoptera	Curculionidae_sp5	2	11	Pitfall	Xil_pe
Coleoptera	Nitidulidae_sp5	3	11	Pitfall	Sap
Coleoptera	Staphylinidae_sp12	1	11	Pitfall	Dep
Coleoptera	Nitidulidae_sp2	3	11	Pitfall	Sap
Coleoptera	Scydmaenidae_sp1	1	11	Pitfall	Dep
Coleoptera	Canthon_sp1	11	11	Pitfall	Sap
Coleoptera	Canthidium_sp1	2	11	Pitfall	Sap
Coleoptera	Tenebrionidae_sp1	6	12	Pitfall	Omn
Coleoptera	Tenebrionidae_sp9	2	12	Pitfall	Omn
Coleoptera	Curculionidae_sp1	3	12	Pitfall	Xil_pe
Coleoptera	Ceratocanthidae_sp1	1	12	Pitfall	Sap
Coleoptera	Nitidulidae_sp5	4	12	Pitfall	Sap
Coleoptera	Histeridae_sp1	1	12	Pitfall	Dep
Coleoptera	Nitidulidae_sp2	4	12	Pitfall	Sap
Coleoptera	Nitidulidae_sp1	2	12	Pitfall	Sap
Coleoptera	Endomychidae_sp1	2	12	Pitfall	Mico
Coleoptera	Cleridae_sp1	1	12	Pitfall	Dep
Blattodea	Blattidae_sp1	1	12	Pitfall	Omn
Orthoptera	Gryllidae_sp1	1	11	Pitfall	Omn
Hemiptera	Aradidae_sp1	1	11	Pitfall	Sap
Blattodea	Blattidae_sp1	1	10	Pitfall	Omn
Hemiptera	Cydnidae_sp1	1	10	Pitfall	F_Sav
Hemiptera	Lygaeidae_sp2	1	10	Pitfall	F_Sav
Hemiptera	Pyrrhocoridae_sp1	1	10	Pitfall	F_Sav
Mantodea	Acanthopidae_sp1	1	10	Pitfall	Dep
Hymenoptera	Ectatoma_ruidum	6	11	Pitfall	Dep
Hymenoptera	Odontomachus_sp2	1	11	Pitfall	Dep
Hymenoptera	Solenopsis_sp1	15	11	Pitfall	Omn
Hymenoptera	Odontomachus_sp3	1	11	Pitfall	Dep
Hymenoptera	Camponotus_sp3	1	11	Pitfall	Nec/Pol
Hymenoptera	Ectatoma_ruidum	11	12	Pitfall	Dep
Hymenoptera	Acromyrmex_sp1	47	12	Pitfall	F_Mas
Hymenoptera	Pseudomyrmex_sp1	1	12	Pitfall	Omn
Hymenoptera	Odontomachus_sp3	2	12	Pitfall	Dep
Hymenoptera	Solenopsis_sp1	5	12	Pitfall	Omn
Hymenoptera	Ectatoma_ruidum	8	10	Pitfall	Dep
Hymenoptera	Pseudomyrmex_sp1	1	10	Pitfall	Omn
Hymenoptera	Camponotus_sp4	1	10	Pitfall	Omn
Hymenoptera	Solenopsis_sp1	1	10	Pitfall	Omn
Hymenoptera	Monomorium_sp1	1	10	Pitfall	Sap
Diptera	Calliphoridae sp1	1	4	Pitfall	Sap
Diptera	Diptera sp1	1	4	Pitfall	Sap
Hymenoptera	Braconidae sp6	1	4	fogging	Par
Hymenoptera	Braconidae sp7	2	4	fogging	Par
Hymenoptera	Braconidae sp8	2	4	fogging	Par
Hymenoptera	Chalcidoidea sp12	1	4	fogging	Par
Hymenoptera	Chalcidoidea sp13	1	4	fogging	Par
Hymenoptera	Chalcidoidea sp14	1	4	fogging	Par
Hymenoptera	Braconidae sp9	1	4	fogging	Par
Hymenoptera	Braconidae sp10	2	4	fogging	Par
Hymenoptera	Braconidae sp7	1	2	fogging	Par
Hymenoptera	Braconidae sp8	1	2	fogging	Par
Hymenoptera	Braconidae sp11	1	2	fogging	Par
Hymenoptera	Chalcidoidea sp15	1	2	fogging	Par
Hymenoptera	Braconidae sp11	1	3	fogging	Par
Hymenoptera	Braconidae sp12	2	3	fogging	Par
Hymenoptera	Braconidae sp13	1	3	fogging	Par
Diptera	Drosophilidae_sp1	1	3	fogging	Sap
Diptera	Phoridae sp1	1	4	fogging	Sap
Hymenoptera	Anochetus_sp1	1	7	Pitfall	Dep
Hymenoptera	Leptogenys_sp1	1	4	Malaise	Dep
Hymenoptera	Cephalotes_sp1	1	4	Malaise	Nec/Pol
Hymenoptera	Odontomachus_sp1	2	4	Malaise	Dep
Hymenoptera	Pseudomyrmex_sp3	1	4	Malaise	Omn

## Sheet: DinamicTable
Sum Abundance	Column Labels
Row Labels	fogging	Malaise	Pitfall	Grand Total
Acanthopidae_sp1			1	1
Acromyrmex_sp1			51	51
Agromyzidae_sp1		1		1
Ampulicidae_sp1		1		1
Anisopodidae_sp1		1		1
Anobiidae_sp1		7		7
Anobiidae_sp3	3	7		10
Anobiidae_sp4	7	1		8
Anochetus_sp1			1	1
Anthicidae_sp1		1		1
Anthomyiidae_sp1		1		1
Aphodiinae_sp1			1	1
Apidae_sp1		2		2
Apidae_sp2		7		7
Apis_sp1			1	1
Apoidea_sp1		1		1
Apoidea_sp2		1		1
Apoidea_sp3		3		3
Apoidea_sp4		2		2
Aradidae_sp1			8	8
Asilidae_sp1		2		2
Asilidae_sp2		3		3
Asilidae_sp3		1		1
Aslidae_sp4		1		1
Aslidae_sp5		1		1
Blattellidae_sp1			1	1
Blattellidae_sp2			3	3
Blattellidae_sp3		1	1	2
Blattidae_sp1			3	3
Bolboceratinae_sp1			1	1
Bostrichidae_sp2		4		4
Bostrichidae_sp3	1	2		3
Bostrichidae_sp4	2	1		3
Brachymyrmex_sp1			5	5
Braconidae sp10	2			2
Braconidae sp11	2			2
Braconidae sp12	2			2
Braconidae sp13	1			1
Braconidae sp6	1			1
Braconidae sp7	3			3
Braconidae sp8	3			3
Braconidae sp9	1			1
Braconidae_sp1		18		18
Braconidae_sp2		8		8
Braconidae_sp3		11		11
Braconidae_sp4		1		1
Braconidae_sp5		3		3
Braconidae_sp6		1		1
Bradynobaenidae_sp1		3		3
Bruchidae_sp2		20	1	21
Buprestidae_sp1	1			1
Calliphoridae sp1			1	1
Calliphoridae_sp1		2		2
Calliphoridae_sp2		3		3
Camponotus_atriceps			1	1
Camponotus_sp2	3	1		4
Camponotus_sp3		5	1	6
Camponotus_sp4	3	1	2	6
Camponotus_sp5	3			3
Camponotus_sp6		24		24
Camponotus_sp7		9	2	11
Canacidae_sp1		1		1
Canthidium_sp1			3	3
Canthon_sp1			93	93
Canthon_sp2			1	1
Carabidae_sp1			1	1
Carabidae_sp2		1		1
Cassidinae_sp1		1		1
Cassidinae_sp2	1			1
Cassidinae_sp3	1			1
Cecidomyiidae_sp1		1		1
Cephalotes_sp1		1		1
Cephalotes_sp17			1	1
Cephalotes_sp2		1		1
Cephalotes_sp3	106	12	2	120
Cephalotes_sp4	65	22		87
Cephalotes_sp5	1	2		3
Cephidae_sp1		1		1
Cerambycidae_sp1		2		2
Cerambycidae_sp2		2		2
Cerambycidae_sp3		1		1
Cerambycidae_sp4	2			2
Cerambycidae_sp5		2		2
Cerambycidae_sp6	1			1
Ceratocanthidae_sp1			3	3
Ceratopogonidae_sp1		1		1
Cercopidae_sp3		1		1
cf_Trichillum_sp1			123	123
Chalcidoidea sp12	1			1
Chalcidoidea sp13	1			1
Chalcidoidea sp14	1			1
Chalcidoidea sp15	1			1
Chalcidoidea_sp1		1		1
Chalcidoidea_sp10		1		1
Chalcidoidea_sp11		1		1
Chalcidoidea_sp2		1		1
Chalcidoidea_sp3		2		2
Chalcidoidea_sp5		1		1
Chalcidoidea_sp6		1		1
Chalcidoidea_sp7		1		1
Chalcidoidea_sp8		1		1
Chalcidoidea_sp9		1		1
Chamaemyiidae_sp2		3		3
Chironomidae_sp1		2		2
Chironomidae_sp2		1		1
Chironomidae_sp3		1		1
Chloropidae_sp1		7	1	8
Chloropidae_sp2		10		10
Chloropidae_sp3		1		1
Chloropidae_sp4		2		2
Chloropidae_sp5		1		1
Chrysidinae_sp1		1		1
Chrysidoidea_sp1		2		2
Chrysidoidea_sp10		1		1
Chrysidoidea_sp11		1		1
Chrysidoidea_sp12		1		1
Chrysidoidea_sp13		1		1
Chrysidoidea_sp14		1		1
Chrysidoidea_sp15		1		1
Chrysidoidea_sp16		1		1
Chrysidoidea_sp17		1		1
Chrysidoidea_sp2		15		15
Chrysidoidea_sp3		1		1
Chrysidoidea_sp4		2		2
Chrysidoidea_sp5		1		1
Chrysidoidea_sp6		1		1
Chrysidoidea_sp7		1		1
Chrysidoidea_sp8		3		3
Chrysidoidea_sp9		1		1
Chrysomelidae_sp1			1	1
Chrysomelidae_sp10	1			1
Chrysomelidae_sp2		40	1	41
Chrysomelidae_sp3	119	37	1	157
Chrysomelidae_sp5	3	4		7
Chrysomelidae_sp6		3		3
Chrysomelidae_sp7		6		6
Chrysomelidae_sp9		1		1
Cicadellidae_sp1			1	1
Cicadellidae_sp10		1		1
Cicadellidae_sp11	1	2		3
Cicadellidae_sp12		1		1
Cicadellidae_sp13	1			1
Cicadellidae_sp2		3		3
Cicadellidae_sp3		2		2
Cicadellidae_sp4		4		4
Cicadellidae_sp5		2		2
Cicadellidae_sp6		4		4
Cicadellidae_sp7		1		1
Cicadellidae_sp8		1		1
Cicadellidae_sp9	25			25
Cleridae_sp1		3	1	4
Cleridae_sp2		10		10
Cleridae_sp3		17		17
Cleridae_sp5		5		5
Clusiidae_sp1		1		1
Coccinellidae_sp1		1		1
Coccinellidae_sp2		1		1
Coccinellidae_sp3		1		1
Coccinellidae_sp4		6		6
Coccinellidae_sp5	1	1		2
Coccinellidae_sp7	1			1
Coccinellidae_sp8	1			1
Coccinellidae_sp9		1		1
Colletidae_sp1		1		1
Conopidae_sp1		1		1
Conopidae_sp2		1		1
Corylophidae_sp1	2	1		3
Corylophidae_sp2	1			1
Crabronidae_sp1		3		3
Crabronidae_sp2		1		1
Cramatogaster_sp1	39	23	3	65
Crematogaster_sp2		9		9
Curculionidae_sp1			12	12
Curculionidae_sp10		4		4
Curculionidae_sp11	2	1		3
Curculionidae_sp12		1		1
Curculionidae_sp13	6			6
Curculionidae_sp14	2			2
Curculionidae_sp15			2	2
Curculionidae_sp2			3	3
Curculionidae_sp3			4	4
Curculionidae_sp4	1		1	2
Curculionidae_sp5		4	10	14
Curculionidae_sp6			1	1
Curculionidae_sp7			1	1
Curculionidae_sp9		1		1
Curtonotidae_sp1		1		1
Curtonotidae_sp2		1		1
Curtonotidae_sp3		2		2
Cydnidae_sp1		2	8	10
Cydnidae_sp2		1		1
Cynipoidea_sp1		1		1
Delphacidae_sp1	4		1	5
Delphacidae_sp2		1		1
Dermestidae_sp1	1	4		5
Dermestidae_sp2	1			1
Dictyopharidae_sp1	1			1
Diptera sp1			1	1
Dolichoderus_sp1	64		1	65
Dolichoderus_sp2		2		2
Dolichopodidae_sp1		66		66
Dolichopodidae_sp2		1		1
Dolichopodidae_sp3		3		3
Dolichopodidae_sp4		10		10
Dolichopodidae_sp5		1		1
Dolichopodidae_sp6		2		2
Drosophilidae_sp1	1	14		15
Drosophilidae_sp2		1		1
Ectatoma_ruidum	1		140	141
Elateridae_sp1			1	1
Elateridae_sp3		12		12
Elateridae_sp5		4		4
Embioptera_sp1			1	1
Empididae_sp1		1		1
Empididae_sp2		2		2
Endomychidae_sp1			3	3
Erotylidae_sp1		3		3
Eucharitidae_sp1		1		1
Evaniidae_sp1		1		1
Evaniidae_sp2		7		7
Evaniidae_sp3		4		4
Formicidae_sp21			1	1
Formicidae_sp8			1	1
Gryllacrididae_sp1		1		1
Gryllidae_sp1			1	1
Gryllidae_sp2			1	1
Hemerobiidae_sp1		1		1
Histeridae_sp1			4	4
Histeridae_sp2	1			1
Homoptera_sp1	1			1
Ichneumonidae_sp1		9	1	10
Ichneumonidae_sp2		2		2
Ichneumonidae_sp3		1		1
Isotomidae_sp1			1	1
Isotomidae_sp2			2	2
Lampyridae_sp1	1			1
Lathridiidae_sp1		2		2
Lauxaniidae_sp1		1		1
Lauxaniidae_sp2		1		1
Lauxaniidae_sp3		4		4
Leptogenys_sp1		1		1
Lonchaeidae_sp1		1		1
Lygaeidae_sp1		2		2
Lygaeidae_sp2			1	1
Lygaeidae_sp3			1	1
Mantidae_sp3	1			1
Mantidae_sp4	2			2
Megalopodidae_sp1		1		1
Meloidae_sp1		1		1
Meloidae_sp2		1		1
Melolonthidae_sp1		2		2
Membracidae_sp1		1		1
Membracidae_sp2		1		1
Membracidae_sp3	1			1
Mesembrinellidae_sp1		2		2
Micropezidae_sp1		12		12
Micropezidae_sp2		2		2
Milichiidae_sp1		2		2
Miridae_sp3	1			1
Miridae_sp4	1			1
Miridae_sp5	4			4
Monomorium_sp1	170	47	2	219
Mordellidae_sp1		2		2
Mordellidae_sp2		4		4
Mordellidae_sp3		1		1
Mordellidae_sp5		33		33
Muscidae_sp1			1	1
Muscidae_sp2		1		1
Muscidae_sp3		1		1
Muscidae_sp4		2		2
Muscidae_sp5		17		17
Muscidae_sp6		1		1
Muscidae_sp7		2		2
Muscidae_sp8		1		1
Muscidae_sp9		1		1
Mutillidae_sp1			2	2
Mutillidae_sp2		3		3
Mutillidae_sp3			1	1
Mycetarotes_sp1			15	15
Mycetophilidae_sp1			1	1
Mycetophilidae_sp2		7		7
Nicoletiidae_sp1			1	1
Nitidulidae_sp1			4	4
Nitidulidae_sp2		4	49	53
Nitidulidae_sp3		1		1
Nitidulidae_sp4		1		1
Nitidulidae_sp5		11	14	25
Odontomachus_sp1		2		2
Odontomachus_sp2			12	12
Odontomachus_sp3			8	8
Onthophagus_sp1			1	1
Onthophagus_sp2			2	2
Orthoptero_sp1			1	1
Pachycondyla_harpax			9	9
Pentatomidae_sp1		1		1
Pheidole_sp1			5	5
Phengodidae_sp1		2		2
Phoridae sp1	1			1
Phoridae_sp1		9	5	14
Phoridae_sp2			1	1
Phoridae_sp3			1	1
Phoridae_sp4		2		2
Phoridae_sp5		6		6
Phoridae_sp6		3		3
Phoridae_sp7		1		1
Piophilidae_sp1		84	1	85
Piophilidae_sp2		4		4
Piophilidae_sp3		1		1
Platygastroidea_sp1		1		1
Platygastroidea_sp2		1		1
Platygastroidea_sp3		1		1
Ploiariidae_sp1	1			1
Pompilidae_sp1			1	1
Pompilidae_sp4		1		1
Pompilidae_sp5		3		3
Proctotrupoidea_sp1		6		6
Proctotrupoidea_sp2		1		1
Proctotrupoidea_sp3		3		3
Proctotrupoidea_sp4		1		1
Proctotrupoidea_sp5		2		2
Proctotrupoidea_sp6		1		1
Pselaphidae_sp1		1		1
Pseudomyrmex_sp1	1	1	5	7
Pseudomyrmex_sp2		11		11
Pseudomyrmex_sp3		1		1
Pseudomyrmex_sp38		5		5
Pseudomyrmex_sp4		9		9
Pseudomyrmex_sp5	32	1		33
Pseudomyrmex_sp6		4		4
Psocoptera_sp1	3	1		4
Psocoptera_sp10	1			1
Psocoptera_sp11	31			31
Psocoptera_sp12	14			14
Psocoptera_sp13	1			1
Psocoptera_sp15	1			1
Psocoptera_sp2	26	1		27
Psocoptera_sp8	7			7
Psocoptera_sp9	1			1
Psychodidae_sp1		1		1
Psychodidae_sp3		1		1
Pyrrhocoridae_sp1			1	1
Reduvidae_sp2	1			1
Rogeria_sp1			1	1
Ropalomeridae_sp1		1		1
Sapygidae_sp1		1		1
Sarcophagidae_sp1		8		8
Sarcophagidae_sp2		1		1
Sarcophagidae_sp3		3		3
Sciaridae_sp1		2		2
Scoliidae_sp1		7		7
Scydmaenidae_sp1		5	4	9
Silvanidae_sp1			5	5
Silvanidae_sp2		1		1
Solenopsis_sp1			83	83
Sphaeroceridae_sp1		3		3
Sphaeroceridae_sp2		1		1
Sphaeroceridae_sp3		1		1
Sphaeroceridae_sp4		1		1
Sphaeroceridae_sp5		1		1
Staphylinidae_sp1		6	1	7
Staphylinidae_sp10		3		3
Staphylinidae_sp11		2		2
Staphylinidae_sp12			1	1
Staphylinidae_sp2		1	4	5
Staphylinidae_sp3		1	1	2
Staphylinidae_sp4			1	1
Staphylinidae_sp5			1	1
Staphylinidae_sp6		2		2
Staphylinidae_sp7		2		2
Staphylinidae_sp8		2		2
Staphylinidae_sp9		3		3
Stratiomyidae_sp1		1		1
Stratiomyidae_sp2		1		1
Stratiomyidae_sp3		1		1
Strumigenys_sp1	1			1
Tabanidae_sp1		11		11
Temnothorax_sp1			1	1
Tenebrionidae_sp1			105	105
Tenebrionidae_sp10		1		1
Tenebrionidae_sp11		4		4
Tenebrionidae_sp12		1		1
Tenebrionidae_sp13		6		6
Tenebrionidae_sp14		2		2
Tenebrionidae_sp15		1		1
Tenebrionidae_sp2			24	24
Tenebrionidae_sp4			4	4
Tenebrionidae_sp5			2	2
Tenebrionidae_sp6			4	4
Tenebrionidae_sp7			1	1
Tenebrionidae_sp8		4		4
Tenebrionidae_sp9		13	3	16
Tettigonidae_sp2		5		5
Thespidae_sp1		1		1
Thespidae_sp2	5			5
Tingidae_sp1	21			21
Tingidae_sp2	5			5
Tiphiidae_sp1		1		1
Tiphiidae_sp15		1		1
Tiphiidae_sp2		1		1
Tiphiidae_sp3		1		1
Tiphiidae_sp4		7		7
Trogossitidae_sp2		1		1
Trogossitidae_sp3		1		1
Ulidiidae_sp1		1		1
Uroxys_sp1		4	211	215
Uroxys_sp2			1	1
Uroxys_sp3			1	1
Vespidae_sp12		2		2
Vespidae_sp2		6		6
Vespidae_sp3		9		9
Vespidae_sp6		1		1
Vespidae_sp8		14		14
Vespidea_sp7		3		3
Grand Total	834	1174	1127	3135

## Sheet: TrapType
Morphos	Fogging	Malaise	Pitfall	Total
Acanthopidae_sp1	0	0	1	1
Acromyrmex_sp1	0	0	51	51
Agromyzidae_sp1	0	1	0	1
Ampulicidae_sp1	0	1	0	1
Anisopodidae_sp1	0	1	0	1
Anobiidae_sp1	0	7	0	7
Anobiidae_sp3	3	7	0	10
Anobiidae_sp4	7	1	0	8
Anochetus_sp1	0	0	1	1
Anthicidae_sp1	0	1	0	1
Anthomyiidae_sp1	0	1	0	1
Aphodiinae_sp1	0	0	1	1
Apidae_sp1	0	2	0	2
Apidae_sp2	0	7	0	7
Apis_sp1	0	0	1	1
Apoidea_sp1	0	1	0	1
Apoidea_sp2	0	1	0	1
Apoidea_sp3	0	3	0	3
Apoidea_sp4	0	2	0	2
Aradidae_sp1	0	0	8	8
Asilidae_sp1	0	2	0	2
Asilidae_sp2	0	3	0	3
Asilidae_sp3	0	1	0	1
Aslidae_sp4	0	1	0	1
Aslidae_sp5	0	1	0	1
Blattellidae_sp1	0	0	1	1
Blattellidae_sp2	0	0	3	3
Blattellidae_sp3	0	1	1	2
Blattidae_sp1	0	0	3	3
Bolboceratinae_sp1	0	0	1	1
Bostrichidae_sp2	0	4	0	4
Bostrichidae_sp3	1	2	0	3
Bostrichidae_sp4	2	1	0	3
Brachymyrmex_sp1	0	0	5	5
Braconidae sp10	2	0	0	2
Braconidae sp11	2	0	0	2
Braconidae sp12	2	0	0	2
Braconidae sp13	1	0	0	1
Braconidae sp6	1	0	0	1
Braconidae sp7	3	0	0	3
Braconidae sp8	3	0	0	3
Braconidae sp9	1	0	0	1
Braconidae_sp1	0	18	0	18
Braconidae_sp2	0	8	0	8
Braconidae_sp3	0	11	0	11
Braconidae_sp4	0	1	0	1
Braconidae_sp5	0	3	0	3
Braconidae_sp6	0	1	0	1
Bradynobaenidae_sp1	0	3	0	3
Bruchidae_sp2	0	20	1	21
Buprestidae_sp1	1	0	0	1
Calliphoridae sp1	0	0	1	1
Calliphoridae_sp1	0	2	0	2
Calliphoridae_sp2	0	3	0	3
Camponotus_atriceps	0	0	1	1
Camponotus_sp2	3	1	0	4
Camponotus_sp3	0	5	1	6
Camponotus_sp4	3	1	2	6
Camponotus_sp5	3	0	0	3
Camponotus_sp6	0	24	0	24
Camponotus_sp7	0	9	2	11
Canacidae_sp1	0	1	0	1
Canthidium_sp1	0	0	3	3
Canthon_sp1	0	0	93	93
Canthon_sp2	0	0	1	1
Carabidae_sp1	0	0	1	1
Carabidae_sp2	0	1	0	1
Cassidinae_sp1	0	1	0	1
Cassidinae_sp2	1	0	0	1
Cassidinae_sp3	1	0	0	1
Cecidomyiidae_sp1	0	1	0	1
Cephalotes_sp1	0	1	0	1
Cephalotes_sp17	0	0	1	1
Cephalotes_sp2	0	1	0	1
Cephalotes_sp3	106	12	2	120
Cephalotes_sp4	65	22	0	87
Cephalotes_sp5	1	2	0	3
Cephidae_sp1	0	1	0	1
Cerambycidae_sp1	0	2	0	2
Cerambycidae_sp2	0	2	0	2
Cerambycidae_sp3	0	1	0	1
Cerambycidae_sp4	2	0	0	2
Cerambycidae_sp5	0	2	0	2
Cerambycidae_sp6	1	0	0	1
Ceratocanthidae_sp1	0	0	3	3
Ceratopogonidae_sp1	0	1	0	1
Cercopidae_sp3	0	1	0	1
cf_Trichillum_sp1	0	0	123	123
Chalcidoidea sp12	1	0	0	1
Chalcidoidea sp13	1	0	0	1
Chalcidoidea sp14	1	0	0	1
Chalcidoidea sp15	1	0	0	1
Chalcidoidea_sp1	0	1	0	1
Chalcidoidea_sp10	0	1	0	1
Chalcidoidea_sp11	0	1	0	1
Chalcidoidea_sp2	0	1	0	1
Chalcidoidea_sp3	0	2	0	2
Chalcidoidea_sp5	0	1	0	1
Chalcidoidea_sp6	0	1	0	1
Chalcidoidea_sp7	0	1	0	1
Chalcidoidea_sp8	0	1	0	1
Chalcidoidea_sp9	0	1	0	1
Chamaemyiidae_sp2	0	3	0	3
Chironomidae_sp1	0	2	0	2
Chironomidae_sp2	0	1	0	1
Chironomidae_sp3	0	1	0	1
Chloropidae_sp1	0	7	1	8
Chloropidae_sp2	0	10	0	10
Chloropidae_sp3	0	1	0	1
Chloropidae_sp4	0	2	0	2
Chloropidae_sp5	0	1	0	1
Chrysidinae_sp1	0	1	0	1
Chrysidoidea_sp1	0	2	0	2
Chrysidoidea_sp10	0	1	0	1
Chrysidoidea_sp11	0	1	0	1
Chrysidoidea_sp12	0	1	0	1
Chrysidoidea_sp13	0	1	0	1
Chrysidoidea_sp14	0	1	0	1
Chrysidoidea_sp15	0	1	0	1
Chrysidoidea_sp16	0	1	0	1
Chrysidoidea_sp17	0	1	0	1
Chrysidoidea_sp2	0	15	0	15
Chrysidoidea_sp3	0	1	0	1
Chrysidoidea_sp4	0	2	0	2
Chrysidoidea_sp5	0	1	0	1
Chrysidoidea_sp6	0	1	0	1
Chrysidoidea_sp7	0	1	0	1
Chrysidoidea_sp8	0	3	0	3
Chrysidoidea_sp9	0	1	0	1
Chrysomelidae_sp1	0	0	1	1
Chrysomelidae_sp10	1	0	0	1
Chrysomelidae_sp2	0	40	1	41
Chrysomelidae_sp3	119	37	1	157
Chrysomelidae_sp5	3	4	0	7
Chrysomelidae_sp6	0	3	0	3
Chrysomelidae_sp7	0	6	0	6
Chrysomelidae_sp9	0	1	0	1
Cicadellidae_sp1	0	0	1	1
Cicadellidae_sp10	0	1	0	1
Cicadellidae_sp11	1	2	0	3
Cicadellidae_sp12	0	1	0	1
Cicadellidae_sp13	1	0	0	1
Cicadellidae_sp2	0	3	0	3
Cicadellidae_sp3	0	2	0	2
Cicadellidae_sp4	0	4	0	4
Cicadellidae_sp5	0	2	0	2
Cicadellidae_sp6	0	4	0	4
Cicadellidae_sp7	0	1	0	1
Cicadellidae_sp8	0	1	0	1
Cicadellidae_sp9	25	0	0	25
Cleridae_sp1	0	3	1	4
Cleridae_sp2	0	10	0	10
Cleridae_sp3	0	17	0	17
Cleridae_sp5	0	5	0	5
Clusiidae_sp1	0	1	0	1
Coccinellidae_sp1	0	1	0	1
Coccinellidae_sp2	0	1	0	1
Coccinellidae_sp3	0	1	0	1
Coccinellidae_sp4	0	6	0	6
Coccinellidae_sp5	1	1	0	2
Coccinellidae_sp7	1	0	0	1
Coccinellidae_sp8	1	0	0	1
Coccinellidae_sp9	0	1	0	1
Colletidae_sp1	0	1	0	1
Conopidae_sp1	0	1	0	1
Conopidae_sp2	0	1	0	1
Corylophidae_sp1	2	1	0	3
Corylophidae_sp2	1	0	0	1
Crabronidae_sp1	0	3	0	3
Crabronidae_sp2	0	1	0	1
Cramatogaster_sp1	39	23	3	65
Crematogaster_sp2	0	9	0	9
Curculionidae_sp1	0	0	12	12
Curculionidae_sp10	0	4	0	4
Curculionidae_sp11	2	1	0	3
Curculionidae_sp12	0	1	0	1
Curculionidae_sp13	6	0	0	6
Curculionidae_sp14	2	0	0	2
Curculionidae_sp15	0	0	2	2
Curculionidae_sp2	0	0	3	3
Curculionidae_sp3	0	0	4	4
Curculionidae_sp4	1	0	1	2
Curculionidae_sp5	0	4	10	14
Curculionidae_sp6	0	0	1	1
Curculionidae_sp7	0	0	1	1
Curculionidae_sp9	0	1	0	1
Curtonotidae_sp1	0	1	0	1
Curtonotidae_sp2	0	1	0	1
Curtonotidae_sp3	0	2	0	2
Cydnidae_sp1	0	2	8	10
Cydnidae_sp2	0	1	0	1
Cynipoidea_sp1	0	1	0	1
Delphacidae_sp1	4	0	1	5
Delphacidae_sp2	0	1	0	1
Dermestidae_sp1	1	4	0	5
Dermestidae_sp2	1	0	0	1
Dictyopharidae_sp1	1	0	0	1
Diptera sp1	0	0	1	1
Dolichoderus_sp1	64	0	1	65
Dolichoderus_sp2	0	2	0	2
Dolichopodidae_sp1	0	66	0	66
Dolichopodidae_sp2	0	1	0	1
Dolichopodidae_sp3	0	3	0	3
Dolichopodidae_sp4	0	10	0	10
Dolichopodidae_sp5	0	1	0	1
Dolichopodidae_sp6	0	2	0	2
Drosophilidae_sp1	1	14	0	15
Drosophilidae_sp2	0	1	0	1
Ectatoma_ruidum	1	0	140	141
Elateridae_sp1	0	0	1	1
Elateridae_sp3	0	12	0	12
Elateridae_sp5	0	4	0	4
Embioptera_sp1	0	0	1	1
Empididae_sp1	0	1	0	1
Empididae_sp2	0	2	0	2
Endomychidae_sp1	0	0	3	3
Erotylidae_sp1	0	3	0	3
Eucharitidae_sp1	0	1	0	1
Evaniidae_sp1	0	1	0	1
Evaniidae_sp2	0	7	0	7
Evaniidae_sp3	0	4	0	4
Formicidae_sp21	0	0	1	1
Formicidae_sp8	0	0	1	1
Gryllacrididae_sp1	0	1	0	1
Gryllidae_sp1	0	0	1	1
Gryllidae_sp2	0	0	1	1
Hemerobiidae_sp1	0	1	0	1
Histeridae_sp1	0	0	4	4
Histeridae_sp2	1	0	0	1
Homoptera_sp1	1	0	0	1
Ichneumonidae_sp1	0	9	1	10
Ichneumonidae_sp2	0	2	0	2
Ichneumonidae_sp3	0	1	0	1
Isotomidae_sp1	0	0	1	1
Isotomidae_sp2	0	0	2	2
Lampyridae_sp1	1	0	0	1
Lathridiidae_sp1	0	2	0	2
Lauxaniidae_sp1	0	1	0	1
Lauxaniidae_sp2	0	1	0	1
Lauxaniidae_sp3	0	4	0	4
Leptogenys_sp1	0	1	0	1
Lonchaeidae_sp1	0	1	0	1
Lygaeidae_sp1	0	2	0	2
Lygaeidae_sp2	0	0	1	1
Lygaeidae_sp3	0	0	1	1
Mantidae_sp3	1	0	0	1
Mantidae_sp4	2	0	0	2
Megalopodidae_sp1	0	1	0	1
Meloidae_sp1	0	1	0	1
Meloidae_sp2	0	1	0	1
Melolonthidae_sp1	0	2	0	2
Membracidae_sp1	0	1	0	1
Membracidae_sp2	0	1	0	1
Membracidae_sp3	1	0	0	1
Mesembrinellidae_sp1	0	2	0	2
Micropezidae_sp1	0	12	0	12
Micropezidae_sp2	0	2	0	2
Milichiidae_sp1	0	2	0	2
Miridae_sp3	1	0	0	1
Miridae_sp4	1	0	0	1
Miridae_sp5	4	0	0	4
Monomorium_sp1	170	47	2	219
Mordellidae_sp1	0	2	0	2
Mordellidae_sp2	0	4	0	4
Mordellidae_sp3	0	1	0	1
Mordellidae_sp5	0	33	0	33
Muscidae_sp1	0	0	1	1
Muscidae_sp2	0	1	0	1
Muscidae_sp3	0	1	0	1
Muscidae_sp4	0	2	0	2
Muscidae_sp5	0	17	0	17
Muscidae_sp6	0	1	0	1
Muscidae_sp7	0	2	0	2
Muscidae_sp8	0	1	0	1
Muscidae_sp9	0	1	0	1
Mutillidae_sp1	0	0	2	2
Mutillidae_sp2	0	3	0	3
Mutillidae_sp3	0	0	1	1
Mycetarotes_sp1	0	0	15	15
Mycetophilidae_sp1	0	0	1	1
Mycetophilidae_sp2	0	7	0	7
Nicoletiidae_sp1	0	0	1	1
Nitidulidae_sp1	0	0	4	4
Nitidulidae_sp2	0	4	49	53
Nitidulidae_sp3	0	1	0	1
Nitidulidae_sp4	0	1	0	1
Nitidulidae_sp5	0	11	14	25
Odontomachus_sp1	0	2	0	2
Odontomachus_sp2	0	0	12	12
Odontomachus_sp3	0	0	8	8
Onthophagus_sp1	0	0	1	1
Onthophagus_sp2	0	0	2	2
Orthoptero_sp1	0	0	1	1
Pachycondyla_harpax	0	0	9	9
Pentatomidae_sp1	0	1	0	1
Pheidole_sp1	0	0	5	5
Phengodidae_sp1	0	2	0	2
Phoridae sp1	1	0	0	1
Phoridae_sp1	0	9	5	14
Phoridae_sp2	0	0	1	1
Phoridae_sp3	0	0	1	1
Phoridae_sp4	0	2	0	2
Phoridae_sp5	0	6	0	6
Phoridae_sp6	0	3	0	3
Phoridae_sp7	0	1	0	1
Piophilidae_sp1	0	84	1	85
Piophilidae_sp2	0	4	0	4
Piophilidae_sp3	0	1	0	1
Platygastroidea_sp1	0	1	0	1
Platygastroidea_sp2	0	1	0	1
Platygastroidea_sp3	0	1	0	1
Ploiariidae_sp1	1	0	0	1
Pompilidae_sp1	0	0	1	1
Pompilidae_sp4	0	1	0	1
Pompilidae_sp5	0	3	0	3
Proctotrupoidea_sp1	0	6	0	6
Proctotrupoidea_sp2	0	1	0	1
Proctotrupoidea_sp3	0	3	0	3
Proctotrupoidea_sp4	0	1	0	1
Proctotrupoidea_sp5	0	2	0	2
Proctotrupoidea_sp6	0	1	0	1
Pselaphidae_sp1	0	1	0	1
Pseudomyrmex_sp1	1	1	5	7
Pseudomyrmex_sp2	0	11	0	11
Pseudomyrmex_sp3	0	1	0	1
Pseudomyrmex_sp38	0	5	0	5
Pseudomyrmex_sp4	0	9	0	9
Pseudomyrmex_sp5	32	1	0	33
Pseudomyrmex_sp6	0	4	0	4
Psocoptera_sp1	3	1	0	4
Psocoptera_sp10	1	0	0	1
Psocoptera_sp11	31	0	0	31
Psocoptera_sp12	14	0	0	14
Psocoptera_sp13	1	0	0	1
Psocoptera_sp15	1	0	0	1
Psocoptera_sp2	26	1	0	27
Psocoptera_sp8	7	0	0	7
Psocoptera_sp9	1	0	0	1
Psychodidae_sp1	0	1	0	1
Psychodidae_sp3	0	1	0	1
Pyrrhocoridae_sp1	0	0	1	1
Reduvidae_sp2	1	0	0	1
Rogeria_sp1	0	0	1	1
Ropalomeridae_sp1	0	1	0	1
Sapygidae_sp1	0	1	0	1
Sarcophagidae_sp1	0	8	0	8
Sarcophagidae_sp2	0	1	0	1
Sarcophagidae_sp3	0	3	0	3
Sciaridae_sp1	0	2	0	2
Scoliidae_sp1	0	7	0	7
Scydmaenidae_sp1	0	5	4	9
Silvanidae_sp1	0	0	5	5
Silvanidae_sp2	0	1	0	1
Solenopsis_sp1	0	0	83	83
Sphaeroceridae_sp1	0	3	0	3
Sphaeroceridae_sp2	0	1	0	1
Sphaeroceridae_sp3	0	1	0	1
Sphaeroceridae_sp4	0	1	0	1
Sphaeroceridae_sp5	0	1	0	1
Staphylinidae_sp1	0	6	1	7
Staphylinidae_sp10	0	3	0	3
Staphylinidae_sp11	0	2	0	2
Staphylinidae_sp12	0	0	1	1
Staphylinidae_sp2	0	1	4	5
Staphylinidae_sp3	0	1	1	2
Staphylinidae_sp4	0	0	1	1
Staphylinidae_sp5	0	0	1	1
Staphylinidae_sp6	0	2	0	2
Staphylinidae_sp7	0	2	0	2
Staphylinidae_sp8	0	2	0	2
Staphylinidae_sp9	0	3	0	3
Stratiomyidae_sp1	0	1	0	1
Stratiomyidae_sp2	0	1	0	1
Stratiomyidae_sp3	0	1	0	1
Strumigenys_sp1	1	0	0	1
Tabanidae_sp1	0	11	0	11
Temnothorax_sp1	0	0	1	1
Tenebrionidae_sp1	0	0	105	105
Tenebrionidae_sp10	0	1	0	1
Tenebrionidae_sp11	0	4	0	4
Tenebrionidae_sp12	0	1	0	1
Tenebrionidae_sp13	0	6	0	6
Tenebrionidae_sp14	0	2	0	2
Tenebrionidae_sp15	0	1	0	1
Tenebrionidae_sp2	0	0	24	24
Tenebrionidae_sp4	0	0	4	4
Tenebrionidae_sp5	0	0	2	2
Tenebrionidae_sp6	0	0	4	4
Tenebrionidae_sp7	0	0	1	1
Tenebrionidae_sp8	0	4	0	4
Tenebrionidae_sp9	0	13	3	16
Tettigonidae_sp2	0	5	0	5
Thespidae_sp1	0	1	0	1
Thespidae_sp2	5	0	0	5
Tingidae_sp1	21	0	0	21
Tingidae_sp2	5	0	0	5
Tiphiidae_sp1	0	1	0	1
Tiphiidae_sp15	0	1	0	1
Tiphiidae_sp2	0	1	0	1
Tiphiidae_sp3	0	1	0	1
Tiphiidae_sp4	0	7	0	7
Trogossitidae_sp2	0	1	0	1
Trogossitidae_sp3	0	1	0	1
Ulidiidae_sp1	0	1	0	1
Uroxys_sp1	0	4	211	215
Uroxys_sp2	0	0	1	1
Uroxys_sp3	0	0	1	1
Vespidae_sp12	0	2	0	2
Vespidae_sp2	0	6	0	6
Vespidae_sp3	0	9	0	9
Vespidae_sp6	0	1	0	1
Vespidae_sp8	0	14	0	14
Vespidea_sp7	0	3	0	3

## Sheet: Order
Morphos	Blattodea	Coleoptera	Diptera	Hemiptera	Hymenoptera	Mantodea	Orthoptera	Psocoptera	Total
Acanthopidae_sp1	0	0	0	0	0	1	0	0	1
Acromyrmex_sp1	0	0	0	0	51	0	0	0	51
Agromyzidae_sp1	0	0	1	0	0	0	0	0	1
Ampulicidae_sp1	0	0	0	0	1	0	0	0	1
Anisopodidae_sp1	0	0	1	0	0	0	0	0	1
Anobiidae_sp1	0	7	0	0	0	0	0	0	7
Anobiidae_sp3	0	10	0	0	0	0	0	0	10
Anobiidae_sp4	0	8	0	0	0	0	0	0	8
Anochetus_sp1	0	0	0	0	1	0	0	0	1
Anthicidae_sp1	0	1	0	0	0	0	0	0	1
Anthomyiidae_sp1	0	0	1	0	0	0	0	0	1
Aphodiinae_sp1	0	1	0	0	0	0	0	0	1
Apidae_sp1	0	0	0	0	2	0	0	0	2
Apidae_sp2	0	0	0	0	7	0	0	0	7
Apis_sp1	0	0	0	0	1	0	0	0	1
Apoidea_sp1	0	0	0	0	1	0	0	0	1
Apoidea_sp2	0	0	0	0	1	0	0	0	1
Apoidea_sp3	0	0	0	0	3	0	0	0	3
Apoidea_sp4	0	0	0	0	2	0	0	0	2
Aradidae_sp1	0	0	0	8	0	0	0	0	8
Asilidae_sp1	0	0	2	0	0	0	0	0	2
Asilidae_sp2	0	0	3	0	0	0	0	0	3
Asilidae_sp3	0	0	1	0	0	0	0	0	1
Aslidae_sp4	0	0	1	0	0	0	0	0	1
Aslidae_sp5	0	0	1	0	0	0	0	0	1
Blattellidae_sp1	1	0	0	0	0	0	0	0	1
Blattellidae_sp2	3	0	0	0	0	0	0	0	3
Blattellidae_sp3	2	0	0	0	0	0	0	0	2
Blattidae_sp1	3	0	0	0	0	0	0	0	3
Bolboceratinae_sp1	0	1	0	0	0	0	0	0	1
Bostrichidae_sp2	0	4	0	0	0	0	0	0	4
Bostrichidae_sp3	0	3	0	0	0	0	0	0	3
Bostrichidae_sp4	0	3	0	0	0	0	0	0	3
Brachymyrmex_sp1	0	0	0	0	5	0	0	0	5
Braconidae sp10	0	0	0	0	2	0	0	0	2
Braconidae sp11	0	0	0	0	2	0	0	0	2
Braconidae sp12	0	0	0	0	2	0	0	0	2
Braconidae sp13	0	0	0	0	1	0	0	0	1
Braconidae sp6	0	0	0	0	1	0	0	0	1
Braconidae sp7	0	0	0	0	3	0	0	0	3
Braconidae sp8	0	0	0	0	3	0	0	0	3
Braconidae sp9	0	0	0	0	1	0	0	0	1
Braconidae_sp1	0	0	0	0	18	0	0	0	18
Braconidae_sp2	0	0	0	0	8	0	0	0	8
Braconidae_sp3	0	0	0	0	11	0	0	0	11
Braconidae_sp4	0	0	0	0	1	0	0	0	1
Braconidae_sp5	0	0	0	0	3	0	0	0	3
Braconidae_sp6	0	0	0	0	1	0	0	0	1
Bradynobaenidae_sp1	0	0	0	0	3	0	0	0	3
Bruchidae_sp2	0	21	0	0	0	0	0	0	21
Buprestidae_sp1	0	1	0	0	0	0	0	0	1
Calliphoridae sp1	0	0	1	0	0	0	0	0	1
Calliphoridae_sp1	0	0	2	0	0	0	0	0	2
Calliphoridae_sp2	0	0	3	0	0	0	0	0	3
Camponotus_atriceps	0	0	0	0	1	0	0	0	1
Camponotus_sp2	0	0	0	0	4	0	0	0	4
Camponotus_sp3	0	0	0	0	6	0	0	0	6
Camponotus_sp4	0	0	0	0	6	0	0	0	6
Camponotus_sp5	0	0	0	0	3	0	0	0	3
Camponotus_sp6	0	0	0	0	24	0	0	0	24
Camponotus_sp7	0	0	0	0	11	0	0	0	11
Canacidae_sp1	0	0	1	0	0	0	0	0	1
Canthidium_sp1	0	3	0	0	0	0	0	0	3
Canthon_sp1	0	93	0	0	0	0	0	0	93
Canthon_sp2	0	1	0	0	0	0	0	0	1
Carabidae_sp1	0	1	0	0	0	0	0	0	1
Carabidae_sp2	0	1	0	0	0	0	0	0	1
Cassidinae_sp1	0	1	0	0	0	0	0	0	1
Cassidinae_sp2	0	1	0	0	0	0	0	0	1
Cassidinae_sp3	0	1	0	0	0	0	0	0	1
Cecidomyiidae_sp1	0	0	1	0	0	0	0	0	1
Cephalotes_sp1	0	0	0	0	1	0	0	0	1
Cephalotes_sp17	0	0	0	0	1	0	0	0	1
Cephalotes_sp2	0	0	0	0	1	0	0	0	1
Cephalotes_sp3	0	0	0	0	120	0	0	0	120
Cephalotes_sp4	0	0	0	0	87	0	0	0	87
Cephalotes_sp5	0	0	0	0	3	0	0	0	3
Cephidae_sp1	0	0	0	0	1	0	0	0	1
Cerambycidae_sp1	0	2	0	0	0	0	0	0	2
Cerambycidae_sp2	0	2	0	0	0	0	0	0	2
Cerambycidae_sp3	0	1	0	0	0	0	0	0	1
Cerambycidae_sp4	0	2	0	0	0	0	0	0	2
Cerambycidae_sp5	0	2	0	0	0	0	0	0	2
Cerambycidae_sp6	0	1	0	0	0	0	0	0	1
Ceratocanthidae_sp1	0	3	0	0	0	0	0	0	3
Ceratopogonidae_sp1	0	0	1	0	0	0	0	0	1
Cercopidae_sp3	0	0	0	1	0	0	0	0	1
cf_Trichillum_sp1	0	123	0	0	0	0	0	0	123
Chalcidoidea sp12	0	0	0	0	1	0	0	0	1
Chalcidoidea sp13	0	0	0	0	1	0	0	0	1
Chalcidoidea sp14	0	0	0	0	1	0	0	0	1
Chalcidoidea sp15	0	0	0	0	1	0	0	0	1
Chalcidoidea_sp1	0	0	0	0	1	0	0	0	1
Chalcidoidea_sp10	0	0	0	0	1	0	0	0	1
Chalcidoidea_sp11	0	0	0	0	1	0	0	0	1
Chalcidoidea_sp2	0	0	0	0	1	0	0	0	1
Chalcidoidea_sp3	0	0	0	0	2	0	0	0	2
Chalcidoidea_sp5	0	0	0	0	1	0	0	0	1
Chalcidoidea_sp6	0	0	0	0	1	0	0	0	1
Chalcidoidea_sp7	0	0	0	0	1	0	0	0	1
Chalcidoidea_sp8	0	0	0	0	1	0	0	0	1
Chalcidoidea_sp9	0	0	0	0	1	0	0	0	1
Chamaemyiidae_sp2	0	0	3	0	0	0	0	0	3
Chironomidae_sp1	0	0	2	0	0	0	0	0	2
Chironomidae_sp2	0	0	1	0	0	0	0	0	1
Chironomidae_sp3	0	0	1	0	0	0	0	0	1
Chloropidae_sp1	0	0	8	0	0	0	0	0	8
Chloropidae_sp2	0	0	10	0	0	0	0	0	10
Chloropidae_sp3	0	0	1	0	0	0	0	0	1
Chloropidae_sp4	0	0	2	0	0	0	0	0	2
Chloropidae_sp5	0	0	1	0	0	0	0	0	1
Chrysidinae_sp1	0	0	0	0	1	0	0	0	1
Chrysidoidea_sp1	0	0	0	0	2	0	0	0	2
Chrysidoidea_sp10	0	0	0	0	1	0	0	0	1
Chrysidoidea_sp11	0	0	0	0	1	0	0	0	1
Chrysidoidea_sp12	0	0	0	0	1	0	0	0	1
Chrysidoidea_sp13	0	0	0	0	1	0	0	0	1
Chrysidoidea_sp14	0	0	0	0	1	0	0	0	1
Chrysidoidea_sp15	0	0	0	0	1	0	0	0	1
Chrysidoidea_sp16	0	0	0	0	1	0	0	0	1
Chrysidoidea_sp17	0	0	0	0	1	0	0	0	1
Chrysidoidea_sp2	0	0	0	0	15	0	0	0	15
Chrysidoidea_sp3	0	0	0	0	1	0	0	0	1
Chrysidoidea_sp4	0	0	0	0	2	0	0	0	2
Chrysidoidea_sp5	0	0	0	0	1	0	0	0	1
Chrysidoidea_sp6	0	0	0	0	1	0	0	0	1
Chrysidoidea_sp7	0	0	0	0	1	0	0	0	1
Chrysidoidea_sp8	0	0	0	0	3	0	0	0	3
Chrysidoidea_sp9	0	0	0	0	1	0	0	0	1
Chrysomelidae_sp1	0	1	0	0	0	0	0	0	1
Chrysomelidae_sp10	0	1	0	0	0	0	0	0	1
Chrysomelidae_sp2	0	41	0	0	0	0	0	0	41
Chrysomelidae_sp3	0	157	0	0	0	0	0	0	157
Chrysomelidae_sp5	0	7	0	0	0	0	0	0	7
Chrysomelidae_sp6	0	3	0	0	0	0	0	0	3
Chrysomelidae_sp7	0	6	0	0	0	0	0	0	6
Chrysomelidae_sp9	0	1	0	0	0	0	0	0	1
Cicadellidae_sp1	0	0	0	1	0	0	0	0	1
Cicadellidae_sp10	0	0	0	1	0	0	0	0	1
Cicadellidae_sp11	0	0	0	3	0	0	0	0	3
Cicadellidae_sp12	0	0	0	1	0	0	0	0	1
Cicadellidae_sp13	0	0	0	1	0	0	0	0	1
Cicadellidae_sp2	0	0	0	3	0	0	0	0	3
Cicadellidae_sp3	0	0	0	2	0	0	0	0	2
Cicadellidae_sp4	0	0	0	4	0	0	0	0	4
Cicadellidae_sp5	0	0	0	2	0	0	0	0	2
Cicadellidae_sp6	0	0	0	4	0	0	0	0	4
Cicadellidae_sp7	0	0	0	1	0	0	0	0	1
Cicadellidae_sp8	0	0	0	1	0	0	0	0	1
Cicadellidae_sp9	0	0	0	25	0	0	0	0	25
Cleridae_sp1	0	4	0	0	0	0	0	0	4
Cleridae_sp2	0	10	0	0	0	0	0	0	10
Cleridae_sp3	0	17	0	0	0	0	0	0	17
Cleridae_sp5	0	5	0	0	0	0	0	0	5
Clusiidae_sp1	0	0	1	0	0	0	0	0	1
Coccinellidae_sp1	0	1	0	0	0	0	0	0	1
Coccinellidae_sp2	0	1	0	0	0	0	0	0	1
Coccinellidae_sp3	0	1	0	0	0	0	0	0	1
Coccinellidae_sp4	0	6	0	0	0	0	0	0	6
Coccinellidae_sp5	0	2	0	0	0	0	0	0	2
Coccinellidae_sp7	0	1	0	0	0	0	0	0	1
Coccinellidae_sp8	0	1	0	0	0	0	0	0	1
Coccinellidae_sp9	0	1	0	0	0	0	0	0	1
Colletidae_sp1	0	0	0	0	1	0	0	0	1
Conopidae_sp1	0	0	1	0	0	0	0	0	1
Conopidae_sp2	0	0	1	0	0	0	0	0	1
Corylophidae_sp1	0	3	0	0	0	0	0	0	3
Corylophidae_sp2	0	1	0	0	0	0	0	0	1
Crabronidae_sp1	0	0	0	0	3	0	0	0	3
Crabronidae_sp2	0	0	0	0	1	0	0	0	1
Cramatogaster_sp1	0	0	0	0	65	0	0	0	65
Crematogaster_sp2	0	0	0	0	9	0	0	0	9
Curculionidae_sp1	0	12	0	0	0	0	0	0	12
Curculionidae_sp10	0	4	0	0	0	0	0	0	4
Curculionidae_sp11	0	3	0	0	0	0	0	0	3
Curculionidae_sp12	0	1	0	0	0	0	0	0	1
Curculionidae_sp13	0	6	0	0	0	0	0	0	6
Curculionidae_sp14	0	2	0	0	0	0	0	0	2
Curculionidae_sp15	0	2	0	0	0	0	0	0	2
Curculionidae_sp2	0	3	0	0	0	0	0	0	3
Curculionidae_sp3	0	4	0	0	0	0	0	0	4
Curculionidae_sp4	0	2	0	0	0	0	0	0	2
Curculionidae_sp5	0	14	0	0	0	0	0	0	14
Curculionidae_sp6	0	1	0	0	0	0	0	0	1
Curculionidae_sp7	0	1	0	0	0	0	0	0	1
Curculionidae_sp9	0	1	0	0	0	0	0	0	1
Curtonotidae_sp1	0	0	1	0	0	0	0	0	1
Curtonotidae_sp2	0	0	1	0	0	0	0	0	1
Curtonotidae_sp3	0	0	2	0	0	0	0	0	2
Cydnidae_sp1	0	0	0	10	0	0	0	0	10
Cydnidae_sp2	0	0	0	1	0	0	0	0	1
Cynipoidea_sp1	0	0	0	0	1	0	0	0	1
Delphacidae_sp1	0	0	0	5	0	0	0	0	5
Delphacidae_sp2	0	0	0	1	0	0	0	0	1
Dermestidae_sp1	0	5	0	0	0	0	0	0	5
Dermestidae_sp2	0	1	0	0	0	0	0	0	1
Dictyopharidae_sp1	0	0	0	1	0	0	0	0	1
Diptera sp1	0	0	1	0	0	0	0	0	1
Dolichoderus_sp1	0	0	0	0	65	0	0	0	65
Dolichoderus_sp2	0	0	0	0	2	0	0	0	2
Dolichopodidae_sp1	0	0	66	0	0	0	0	0	66
Dolichopodidae_sp2	0	0	1	0	0	0	0	0	1
Dolichopodidae_sp3	0	0	3	0	0	0	0	0	3
Dolichopodidae_sp4	0	0	10	0	0	0	0	0	10
Dolichopodidae_sp5	0	0	1	0	0	0	0	0	1
Dolichopodidae_sp6	0	0	2	0	0	0	0	0	2
Drosophilidae_sp1	0	0	15	0	0	0	0	0	15
Drosophilidae_sp2	0	0	1	0	0	0	0	0	1
Ectatoma_ruidum	0	0	0	0	141	0	0	0	141
Elateridae_sp1	0	1	0	0	0	0	0	0	1
Elateridae_sp3	0	12	0	0	0	0	0	0	12
Elateridae_sp5	0	4	0	0	0	0	0	0	4
Embioptera_sp1	0	0	0	0	0	0	0	0	0
Empididae_sp1	0	0	1	0	0	0	0	0	1
Empididae_sp2	0	0	2	0	0	0	0	0	2
Endomychidae_sp1	0	3	0	0	0	0	0	0	3
Erotylidae_sp1	0	3	0	0	0	0	0	0	3
Eucharitidae_sp1	0	0	0	0	1	0	0	0	1
Evaniidae_sp1	0	0	0	0	1	0	0	0	1
Evaniidae_sp2	0	0	0	0	7	0	0	0	7
Evaniidae_sp3	0	0	0	0	4	0	0	0	4
Formicidae_sp21	0	0	0	0	1	0	0	0	1
Formicidae_sp8	0	0	0	0	1	0	0	0	1
Gryllacrididae_sp1	0	0	0	0	0	0	1	0	1
Gryllidae_sp1	0	0	0	0	0	0	1	0	1
Gryllidae_sp2	0	0	0	0	0	0	1	0	1
Hemerobiidae_sp1	0	0	0	0	0	0	0	0	0
Histeridae_sp1	0	4	0	0	0	0	0	0	4
Histeridae_sp2	0	1	0	0	0	0	0	0	1
Homoptera_sp1	0	0	0	1	0	0	0	0	1
Ichneumonidae_sp1	0	0	0	0	10	0	0	0	10
Ichneumonidae_sp2	0	0	0	0	2	0	0	0	2
Ichneumonidae_sp3	0	0	0	0	1	0	0	0	1
Isotomidae_sp1	0	0	0	0	0	0	0	0	0
Isotomidae_sp2	0	0	0	0	0	0	0	0	0
Lampyridae_sp1	0	1	0	0	0	0	0	0	1
Lathridiidae_sp1	0	2	0	0	0	0	0	0	2
Lauxaniidae_sp1	0	0	1	0	0	0	0	0	1
Lauxaniidae_sp2	0	0	1	0	0	0	0	0	1
Lauxaniidae_sp3	0	0	4	0	0	0	0	0	4
Leptogenys_sp1	0	0	0	0	1	0	0	0	1
Lonchaeidae_sp1	0	0	1	0	0	0	0	0	1
Lygaeidae_sp1	0	0	0	2	0	0	0	0	2
Lygaeidae_sp2	0	0	0	1	0	0	0	0	1
Lygaeidae_sp3	0	0	0	1	0	0	0	0	1
Mantidae_sp3	0	0	0	0	0	1	0	0	1
Mantidae_sp4	0	0	0	0	0	2	0	0	2
Megalopodidae_sp1	0	1	0	0	0	0	0	0	1
Meloidae_sp1	0	1	0	0	0	0	0	0	1
Meloidae_sp2	0	1	0	0	0	0	0	0	1
Melolonthidae_sp1	0	2	0	0	0	0	0	0	2
Membracidae_sp1	0	0	0	1	0	0	0	0	1
Membracidae_sp2	0	0	0	1	0	0	0	0	1
Membracidae_sp3	0	0	0	1	0	0	0	0	1
Mesembrinellidae_sp1	0	0	2	0	0	0	0	0	2
Micropezidae_sp1	0	0	12	0	0	0	0	0	12
Micropezidae_sp2	0	0	2	0	0	0	0	0	2
Milichiidae_sp1	0	0	2	0	0	0	0	0	2
Miridae_sp3	0	0	0	1	0	0	0	0	1
Miridae_sp4	0	0	0	1	0	0	0	0	1
Miridae_sp5	0	0	0	4	0	0	0	0	4
Monomorium_sp1	0	0	0	0	219	0	0	0	219
Mordellidae_sp1	0	2	0	0	0	0	0	0	2
Mordellidae_sp2	0	4	0	0	0	0	0	0	4
Mordellidae_sp3	0	1	0	0	0	0	0	0	1
Mordellidae_sp5	0	33	0	0	0	0	0	0	33
Muscidae_sp1	0	0	1	0	0	0	0	0	1
Muscidae_sp2	0	0	1	0	0	0	0	0	1
Muscidae_sp3	0	0	1	0	0	0	0	0	1
Muscidae_sp4	0	0	2	0	0	0	0	0	2
Muscidae_sp5	0	0	17	0	0	0	0	0	17
Muscidae_sp6	0	0	1	0	0	0	0	0	1
Muscidae_sp7	0	0	2	0	0	0	0	0	2
Muscidae_sp8	0	0	1	0	0	0	0	0	1
Muscidae_sp9	0	0	1	0	0	0	0	0	1
Mutillidae_sp1	0	0	0	0	2	0	0	0	2
Mutillidae_sp2	0	0	0	0	3	0	0	0	3
Mutillidae_sp3	0	0	0	0	1	0	0	0	1
Mycetarotes_sp1	0	0	0	0	15	0	0	0	15
Mycetophilidae_sp1	0	0	1	0	0	0	0	0	1
Mycetophilidae_sp2	0	0	7	0	0	0	0	0	7
Nicoletiidae_sp1	0	0	0	0	0	0	0	0	0
Nitidulidae_sp1	0	4	0	0	0	0	0	0	4
Nitidulidae_sp2	0	53	0	0	0	0	0	0	53
Nitidulidae_sp3	0	1	0	0	0	0	0	0	1
Nitidulidae_sp4	0	1	0	0	0	0	0	0	1
Nitidulidae_sp5	0	25	0	0	0	0	0	0	25
Odontomachus_sp1	0	0	0	0	2	0	0	0	2
Odontomachus_sp2	0	0	0	0	12	0	0	0	12
Odontomachus_sp3	0	0	0	0	8	0	0	0	8
Onthophagus_sp1	0	1	0	0	0	0	0	0	1
Onthophagus_sp2	0	2	0	0	0	0	0	0	2
Orthoptero_sp1	0	0	0	0	0	0	1	0	1
Pachycondyla_harpax	0	0	0	0	9	0	0	0	9
Pentatomidae_sp1	0	0	0	1	0	0	0	0	1
Pheidole_sp1	0	0	0	0	5	0	0	0	5
Phengodidae_sp1	0	2	0	0	0	0	0	0	2
Phoridae sp1	0	0	1	0	0	0	0	0	1
Phoridae_sp1	0	0	14	0	0	0	0	0	14
Phoridae_sp2	0	0	1	0	0	0	0	0	1
Phoridae_sp3	0	0	1	0	0	0	0	0	1
Phoridae_sp4	0	0	2	0	0	0	0	0	2
Phoridae_sp5	0	0	6	0	0	0	0	0	6
Phoridae_sp6	0	0	3	0	0	0	0	0	3
Phoridae_sp7	0	0	1	0	0	0	0	0	1
Piophilidae_sp1	0	0	85	0	0	0	0	0	85
Piophilidae_sp2	0	0	4	0	0	0	0	0	4
Piophilidae_sp3	0	0	1	0	0	0	0	0	1
Platygastroidea_sp1	0	0	0	0	1	0	0	0	1
Platygastroidea_sp2	0	0	0	0	1	0	0	0	1
Platygastroidea_sp3	0	0	0	0	1	0	0	0	1
Ploiariidae_sp1	0	0	0	1	0	0	0	0	1
Pompilidae_sp1	0	0	0	0	1	0	0	0	1
Pompilidae_sp4	0	0	0	0	1	0	0	0	1
Pompilidae_sp5	0	0	0	0	3	0	0	0	3
Proctotrupoidea_sp1	0	0	0	0	6	0	0	0	6
Proctotrupoidea_sp2	0	0	0	0	1	0	0	0	1
Proctotrupoidea_sp3	0	0	0	0	3	0	0	0	3
Proctotrupoidea_sp4	0	0	0	0	1	0	0	0	1
Proctotrupoidea_sp5	0	0	0	0	2	0	0	0	2
Proctotrupoidea_sp6	0	0	0	0	1	0	0	0	1
Pselaphidae_sp1	0	1	0	0	0	0	0	0	1
Pseudomyrmex_sp1	0	0	0	0	7	0	0	0	7
Pseudomyrmex_sp2	0	0	0	0	11	0	0	0	11
Pseudomyrmex_sp3	0	0	0	0	1	0	0	0	1
Pseudomyrmex_sp38	0	0	0	0	5	0	0	0	5
Pseudomyrmex_sp4	0	0	0	0	9	0	0	0	9
Pseudomyrmex_sp5	0	0	0	0	33	0	0	0	33
Pseudomyrmex_sp6	0	0	0	0	4	0	0	0	4
Psocoptera_sp1	0	0	0	0	0	0	0	4	4
Psocoptera_sp10	0	0	0	0	0	0	0	1	1
Psocoptera_sp11	0	0	0	0	0	0	0	31	31
Psocoptera_sp12	0	0	0	0	0	0	0	14	14
Psocoptera_sp13	0	0	0	0	0	0	0	1	1
Psocoptera_sp15	0	0	0	0	0	0	0	1	1
Psocoptera_sp2	0	0	0	0	0	0	0	27	27
Psocoptera_sp8	0	0	0	0	0	0	0	7	7
Psocoptera_sp9	0	0	0	0	0	0	0	1	1
Psychodidae_sp1	0	0	1	0	0	0	0	0	1
Psychodidae_sp3	0	0	1	0	0	0	0	0	1
Pyrrhocoridae_sp1	0	0	0	1	0	0	0	0	1
Reduvidae_sp2	0	0	0	1	0	0	0	0	1
Rogeria_sp1	0	0	0	0	1	0	0	0	1
Ropalomeridae_sp1	0	0	1	0	0	0	0	0	1
Sapygidae_sp1	0	0	0	0	1	0	0	0	1
Sarcophagidae_sp1	0	0	8	0	0	0	0	0	8
Sarcophagidae_sp2	0	0	1	0	0	0	0	0	1
Sarcophagidae_sp3	0	0	3	0	0	0	0	0	3
Sciaridae_sp1	0	0	2	0	0	0	0	0	2
Scoliidae_sp1	0	0	0	0	7	0	0	0	7
Scydmaenidae_sp1	0	9	0	0	0	0	0	0	9
Silvanidae_sp1	0	5	0	0	0	0	0	0	5
Silvanidae_sp2	0	1	0	0	0	0	0	0	1
Solenopsis_sp1	0	0	0	0	83	0	0	0	83
Sphaeroceridae_sp1	0	0	3	0	0	0	0	0	3
Sphaeroceridae_sp2	0	0	1	0	0	0	0	0	1
Sphaeroceridae_sp3	0	0	1	0	0	0	0	0	1
Sphaeroceridae_sp4	0	0	1	0	0	0	0	0	1
Sphaeroceridae_sp5	0	0	1	0	0	0	0	0	1
Staphylinidae_sp1	0	7	0	0	0	0	0	0	7
Staphylinidae_sp10	0	3	0	0	0	0	0	0	3
Staphylinidae_sp11	0	2	0	0	0	0	0	0	2
Staphylinidae_sp12	0	1	0	0	0	0	0	0	1
Staphylinidae_sp2	0	5	0	0	0	0	0	0	5
Staphylinidae_sp3	0	2	0	0	0	0	0	0	2
Staphylinidae_sp4	0	1	0	0	0	0	0	0	1
Staphylinidae_sp5	0	1	0	0	0	0	0	0	1
Staphylinidae_sp6	0	2	0	0	0	0	0	0	2
Staphylinidae_sp7	0	2	0	0	0	0	0	0	2
Staphylinidae_sp8	0	2	0	0	0	0	0	0	2
Staphylinidae_sp9	0	3	0	0	0	0	0	0	3
Stratiomyidae_sp1	0	0	1	0	0	0	0	0	1
Stratiomyidae_sp2	0	0	1	0	0	0	0	0	1
Stratiomyidae_sp3	0	0	1	0	0	0	0	0	1
Strumigenys_sp1	0	0	0	0	1	0	0	0	1
Tabanidae_sp1	0	0	11	0	0	0	0	0	11
Temnothorax_sp1	0	0	0	0	1	0	0	0	1
Tenebrionidae_sp1	0	105	0	0	0	0	0	0	105
Tenebrionidae_sp10	0	1	0	0	0	0	0	0	1
Tenebrionidae_sp11	0	4	0	0	0	0	0	0	4
Tenebrionidae_sp12	0	1	0	0	0	0	0	0	1
Tenebrionidae_sp13	0	6	0	0	0	0	0	0	6
Tenebrionidae_sp14	0	2	0	0	0	0	0	0	2
Tenebrionidae_sp15	0	1	0	0	0	0	0	0	1
Tenebrionidae_sp2	0	24	0	0	0	0	0	0	24
Tenebrionidae_sp4	0	4	0	0	0	0	0	0	4
Tenebrionidae_sp5	0	2	0	0	0	0	0	0	2
Tenebrionidae_sp6	0	4	0	0	0	0	0	0	4
Tenebrionidae_sp7	0	1	0	0	0	0	0	0	1
Tenebrionidae_sp8	0	4	0	0	0	0	0	0	4
Tenebrionidae_sp9	0	16	0	0	0	0	0	0	16
Tettigonidae_sp2	0	0	0	0	0	0	5	0	5
Thespidae_sp1	0	0	0	0	0	1	0	0	1
Thespidae_sp2	0	0	0	0	0	5	0	0	5
Tingidae_sp1	0	0	0	21	0	0	0	0	21
Tingidae_sp2	0	0	0	5	0	0	0	0	5
Tiphiidae_sp1	0	0	0	0	1	0	0	0	1
Tiphiidae_sp15	0	0	0	0	1	0	0	0	1
Tiphiidae_sp2	0	0	0	0	1	0	0	0	1
Tiphiidae_sp3	0	0	0	0	1	0	0	0	1
Tiphiidae_sp4	0	0	0	0	7	0	0	0	7
Trogossitidae_sp2	0	1	0	0	0	0	0	0	1
Trogossitidae_sp3	0	1	0	0	0	0	0	0	1
Ulidiidae_sp1	0	0	1	0	0	0	0	0	1
Uroxys_sp1	0	215	0	0	0	0	0	0	215
Uroxys_sp2	0	1	0	0	0	0	0	0	1
Uroxys_sp3	0	1	0	0	0	0	0	0	1
Vespidae_sp12	0	0	0	0	2	0	0	0	2
Vespidae_sp2	0	0	0	0	6	0	0	0	6
Vespidae_sp3	0	0	0	0	9	0	0	0	9
Vespidae_sp6	0	0	0	0	1	0	0	0	1
Vespidae_sp8	0	0	0	0	14	0	0	0	14
Vespidea_sp7	0	0	0	0	3	0	0	0	3

## Sheet: OXT
Order	Fogging	Malaise	Pitfall	Total
Blattodea	0	1	8	9
Coleoptera	163	357	717	1237
Collembola	0	0	3	3
Diptera	2	362	13	377
Embioptera	0	0	1	1
Hemiptera	68	31	21	120
Hymenoptera	508	413	359	1280
Mantodea	8	1	1	10
Neuroptera	0	1	0	1
Orthoptera	0	6	3	9
Psocoptera	85	2	0	87
Zygentoma	0	0	1	1

## Sheet: Families
Family	Fogging	Malaise	Pitfall
Acanthopidae	0	0	1
Agromyzidae	0	1	0
Ampulicidae	0	1	0
Anisopodidae	0	1	0
Anobiidae	10	15	0
Anthicidae	0	1	0
Anthomyiidae	0	1	0
Aphodiinae	0	0	1
Apidae	0	9	1
Apoidea	0	7	0
Aradidae	0	0	8
Asilidae	0	6	0
Aslidae	0	2	0
Blattellidae	0	1	5
Blattidae	0	0	3
Bolboceratidae	0	0	1
Bostrichidae	3	7	0
Braconidae	15	42	0
Bradynobaenidae	0	3	0
Bruchidae	0	20	1
Buprestidae	1	0	0
Calliphoridae	0	5	0
Calliphoridae	0	0	1
Canacidae	0	1	0
Carabidae	0	1	1
Cassidinae	2	1	0
Cecidomyiidae	0	1	0
Cephidae	0	1	0
Cerambycidae	3	7	0
Ceratocanthidae	0	0	3
Ceratopogonidae	0	1	0
Cercopidae	0	1	0
Chalcidoidea	4	11	0
Chamaemyiidae	0	3	0
Chironomidae	0	4	0
Chloropidae	0	21	1
Chrysidinae	0	1	0
Chrysidoidea	0	35	0
Chrysomelidae	123	91	3
Cicadellidae	27	21	1
Cleridae	0	35	1
Clusiidae	0	1	0
Coccinellidae	3	11	0
Colletidae	0	1	0
Conopidae	0	2	0
Corylophidae	3	1	0
Crabronidae	0	4	0
Cramatogaster	39	23	3
Crematogaster	0	9	0
Curculionidae	11	11	34
Curtonotidae	0	4	0
Cydnidae	0	3	8
Cynipoidea	0	1	0
Delphacidae	4	1	1
Dermestidae	2	4	0
Dictyopharidae	1	0	0
Diptera sp1	0	0	1
Dolichopodidae	0	83	0
Drosophilidae	1	15	0
Elateridae	0	16	1
Embioptera	0	0	1
Empididae	0	3	0
Endomychidae	0	0	3
Erotylidae	0	3	0
Eucharitidae	0	1	0
Evaniidae	0	12	0
Formicidae	450	162	350
Gryllacrididae	0	1	0
Gryllidae	0	0	2
Hemerobiidae	0	1	0
Histeridae	1	0	4
Homoptera	1	0	0
Ichneumonidae	0	12	1
Isotomidae	0	0	3
Lampyridae	1	0	0
Lathridiidae	0	2	0
Lauxaniidae	0	6	0
Lonchaeidae	0	1	0
Lygaeidae	0	2	2
Mantidae	3	0	0
Megalopodidae	0	1	0
Meloidae	0	2	0
Melolonthidae	0	2	0
Membracidae	1	2	0
Mesembrinellidae	0	2	0
Micropezidae	0	14	0
Milichiidae	0	2	0
Miridae	6	0	0
Mordellidae	0	40	0
Muscidae	0	26	1
Mutillidae	0	3	3
Mycetophilidae	0	7	1
Nicoletiidae	0	0	1
Nitidulidae	0	17	67
Orthoptero	0	0	1
Pentatomidae	0	1	0
Phengodidae	0	2	0
Phoridae	1	21	7
Piophilidae	0	89	1
Platygastroidea	0	3	0
Ploiariidae	1	0	0
Pompilidae	0	4	1
Proctotrupoidea	0	14	0
Pselaphidae	0	1	0
Psocoptera	85	2	0
Psychodidae	0	2	0
Pyrrhocoridae	0	0	1
Reduvidae	1	0	0
Ropalomeridae	0	1	0
Sapygidae	0	1	0
Sarcophagidae	0	12	0
Scarabaeidae	0	4	436
Sciaridae	0	2	0
Scoliidae	0	7	0
Scydmaenidae	0	5	4
Silvanidae	0	1	5
Sphaeroceridae	0	7	0
Staphylinidae	0	22	9
Stratiomyidae	0	3	0
Tabanidae	0	11	0
Tenebrionidae	0	32	143
Tettigonidae	0	5	0
Thespidae	5	1	0
Tingidae	26	0	0
Tiphiidae	0	11	0
Trogossitidae	0	2	0
Ulidiidae	0	1	0
Vespidae	0	32	0
Vespidea	0	3	0
(en blanco)
Total general	834	1174	1127

## Sheet: CHDH_subset
Morphos	Coleoptera	Diptera	Hemiptera	Hymenoptera
Monomorium_sp1	0	0	0	219
Ectatoma_ruidum	0	0	0	141
Cephalotes_sp3	0	0	0	120
Cephalotes_sp4	0	0	0	87
Solenopsis_sp1	0	0	0	83
Cramatogaster_sp1	0	0	0	65
Dolichoderus_sp1	0	0	0	65
Acromyrmex_sp1	0	0	0	51
Pseudomyrmex_sp5	0	0	0	33
Camponotus_sp6	0	0	0	24
Braconidae_sp1	0	0	0	18
Chrysidoidea_sp2	0	0	0	15
Mycetarotes_sp1	0	0	0	15
Vespidae_sp8	0	0	0	14
Odontomachus_sp2	0	0	0	12
Braconidae_sp3	0	0	0	11
Camponotus_sp7	0	0	0	11
Pseudomyrmex_sp2	0	0	0	11
Ichneumonidae_sp1	0	0	0	10
Crematogaster_sp2	0	0	0	9
Pachycondyla_harpax	0	0	0	9
Pseudomyrmex_sp4	0	0	0	9
Vespidae_sp3	0	0	0	9
Braconidae_sp2	0	0	0	8
Odontomachus_sp3	0	0	0	8
Apidae_sp2	0	0	0	7
Evaniidae_sp2	0	0	0	7
Pseudomyrmex_sp1	0	0	0	7
Scoliidae_sp1	0	0	0	7
Tiphiidae_sp4	0	0	0	7
Camponotus_sp3	0	0	0	6
Camponotus_sp4	0	0	0	6
Proctotrupoidea_sp1	0	0	0	6
Vespidae_sp2	0	0	0	6
Brachymyrmex_sp1	0	0	0	5
Pheidole_sp1	0	0	0	5
Pseudomyrmex_sp38	0	0	0	5
Camponotus_sp2	0	0	0	4
Evaniidae_sp3	0	0	0	4
Pseudomyrmex_sp6	0	0	0	4
Apoidea_sp3	0	0	0	3
Braconidae sp7	0	0	0	3
Braconidae sp8	0	0	0	3
Braconidae_sp5	0	0	0	3
Bradynobaenidae_sp1	0	0	0	3
Camponotus_sp5	0	0	0	3
Cephalotes_sp5	0	0	0	3
Chrysidoidea_sp8	0	0	0	3
Crabronidae_sp1	0	0	0	3
Mutillidae_sp2	0	0	0	3
Pompilidae_sp5	0	0	0	3
Proctotrupoidea_sp3	0	0	0	3
Vespidea_sp7	0	0	0	3
Apidae_sp1	0	0	0	2
Apoidea_sp4	0	0	0	2
Braconidae sp10	0	0	0	2
Braconidae sp11	0	0	0	2
Braconidae sp12	0	0	0	2
Chalcidoidea_sp3	0	0	0	2
Chrysidoidea_sp1	0	0	0	2
Chrysidoidea_sp4	0	0	0	2
Dolichoderus_sp2	0	0	0	2
Ichneumonidae_sp2	0	0	0	2
Mutillidae_sp1	0	0	0	2
Odontomachus_sp1	0	0	0	2
Proctotrupoidea_sp5	0	0	0	2
Vespidae_sp12	0	0	0	2
Ampulicidae_sp1	0	0	0	1
Anochetus_sp1	0	0	0	1
Apis_sp1	0	0	0	1
Apoidea_sp1	0	0	0	1
Apoidea_sp2	0	0	0	1
Braconidae sp13	0	0	0	1
Braconidae sp6	0	0	0	1
Braconidae sp9	0	0	0	1
Braconidae_sp4	0	0	0	1
Braconidae_sp6	0	0	0	1
Camponotus_atriceps	0	0	0	1
Cephalotes_sp1	0	0	0	1
Cephalotes_sp17	0	0	0	1
Cephalotes_sp2	0	0	0	1
Cephidae_sp1	0	0	0	1
Chalcidoidea sp12	0	0	0	1
Chalcidoidea sp13	0	0	0	1
Chalcidoidea sp14	0	0	0	1
Chalcidoidea sp15	0	0	0	1
Chalcidoidea_sp1	0	0	0	1
Chalcidoidea_sp10	0	0	0	1
Chalcidoidea_sp11	0	0	0	1
Chalcidoidea_sp2	0	0	0	1
Chalcidoidea_sp5	0	0	0	1
Chalcidoidea_sp6	0	0	0	1
Chalcidoidea_sp7	0	0	0	1
Chalcidoidea_sp8	0	0	0	1
Chalcidoidea_sp9	0	0	0	1
Chrysidinae_sp1	0	0	0	1
Chrysidoidea_sp10	0	0	0	1
Chrysidoidea_sp11	0	0	0	1
Chrysidoidea_sp12	0	0	0	1
Chrysidoidea_sp13	0	0	0	1
Chrysidoidea_sp14	0	0	0	1
Chrysidoidea_sp15	0	0	0	1
Chrysidoidea_sp16	0	0	0	1
Chrysidoidea_sp17	0	0	0	1
Chrysidoidea_sp3	0	0	0	1
Chrysidoidea_sp5	0	0	0	1
Chrysidoidea_sp6	0	0	0	1
Chrysidoidea_sp7	0	0	0	1
Chrysidoidea_sp9	0	0	0	1
Colletidae_sp1	0	0	0	1
Crabronidae_sp2	0	0	0	1
Cynipoidea_sp1	0	0	0	1
Eucharitidae_sp1	0	0	0	1
Evaniidae_sp1	0	0	0	1
Formicidae_sp21	0	0	0	1
Formicidae_sp8	0	0	0	1
Ichneumonidae_sp3	0	0	0	1
Leptogenys_sp1	0	0	0	1
Mutillidae_sp3	0	0	0	1
Platygastroidea_sp1	0	0	0	1
Platygastroidea_sp2	0	0	0	1
Platygastroidea_sp3	0	0	0	1
Pompilidae_sp1	0	0	0	1
Pompilidae_sp4	0	0	0	1
Proctotrupoidea_sp2	0	0	0	1
Proctotrupoidea_sp4	0	0	0	1
Proctotrupoidea_sp6	0	0	0	1
Pseudomyrmex_sp3	0	0	0	1
Rogeria_sp1	0	0	0	1
Sapygidae_sp1	0	0	0	1
Strumigenys_sp1	0	0	0	1
Temnothorax_sp1	0	0	0	1
Tiphiidae_sp1	0	0	0	1
Tiphiidae_sp15	0	0	0	1
Tiphiidae_sp2	0	0	0	1
Tiphiidae_sp3	0	0	0	1
Vespidae_sp6	0	0	0	1
Piophilidae_sp1	0	85	0	0
Dolichopodidae_sp1	0	66	0	0
Muscidae_sp5	0	17	0	0
Drosophilidae_sp1	0	15	0	0
Phoridae_sp1	0	14	0	0
Micropezidae_sp1	0	12	0	0
Tabanidae_sp1	0	11	0	0
Chloropidae_sp2	0	10	0	0
Dolichopodidae_sp4	0	10	0	0
Chloropidae_sp1	0	8	0	0
Sarcophagidae_sp1	0	8	0	0
Mycetophilidae_sp2	0	7	0	0
Phoridae_sp5	0	6	0	0
Lauxaniidae_sp3	0	4	0	0
Piophilidae_sp2	0	4	0	0
Asilidae_sp2	0	3	0	0
Calliphoridae_sp2	0	3	0	0
Chamaemyiidae_sp2	0	3	0	0
Dolichopodidae_sp3	0	3	0	0
Phoridae_sp6	0	3	0	0
Sarcophagidae_sp3	0	3	0	0
Sphaeroceridae_sp1	0	3	0	0
Asilidae_sp1	0	2	0	0
Calliphoridae_sp1	0	2	0	0
Chironomidae_sp1	0	2	0	0
Chloropidae_sp4	0	2	0	0
Curtonotidae_sp3	0	2	0	0
Dolichopodidae_sp6	0	2	0	0
Empididae_sp2	0	2	0	0
Mesembrinellidae_sp1	0	2	0	0
Micropezidae_sp2	0	2	0	0
Milichiidae_sp1	0	2	0	0
Muscidae_sp4	0	2	0	0
Muscidae_sp7	0	2	0	0
Phoridae_sp4	0	2	0	0
Sciaridae_sp1	0	2	0	0
Agromyzidae_sp1	0	1	0	0
Anisopodidae_sp1	0	1	0	0
Anthomyiidae_sp1	0	1	0	0
Asilidae_sp3	0	1	0	0
Aslidae_sp4	0	1	0	0
Aslidae_sp5	0	1	0	0
Calliphoridae sp1	0	1	0	0
Canacidae_sp1	0	1	0	0
Cecidomyiidae_sp1	0	1	0	0
Ceratopogonidae_sp1	0	1	0	0
Chironomidae_sp2	0	1	0	0
Chironomidae_sp3	0	1	0	0
Chloropidae_sp3	0	1	0	0
Chloropidae_sp5	0	1	0	0
Clusiidae_sp1	0	1	0	0
Conopidae_sp1	0	1	0	0
Conopidae_sp2	0	1	0	0
Curtonotidae_sp1	0	1	0	0
Curtonotidae_sp2	0	1	0	0
Diptera sp1	0	1	0	0
Dolichopodidae_sp2	0	1	0	0
Dolichopodidae_sp5	0	1	0	0
Drosophilidae_sp2	0	1	0	0
Empididae_sp1	0	1	0	0
Lauxaniidae_sp1	0	1	0	0
Lauxaniidae_sp2	0	1	0	0
Lonchaeidae_sp1	0	1	0	0
Muscidae_sp1	0	1	0	0
Muscidae_sp2	0	1	0	0
Muscidae_sp3	0	1	0	0
Muscidae_sp6	0	1	0	0
Muscidae_sp8	0	1	0	0
Muscidae_sp9	0	1	0	0
Mycetophilidae_sp1	0	1	0	0
Phoridae sp1	0	1	0	0
Phoridae_sp2	0	1	0	0
Phoridae_sp3	0	1	0	0
Phoridae_sp7	0	1	0	0
Piophilidae_sp3	0	1	0	0
Psychodidae_sp1	0	1	0	0
Psychodidae_sp3	0	1	0	0
Ropalomeridae_sp1	0	1	0	0
Sarcophagidae_sp2	0	1	0	0
Sphaeroceridae_sp2	0	1	0	0
Sphaeroceridae_sp3	0	1	0	0
Sphaeroceridae_sp4	0	1	0	0
Sphaeroceridae_sp5	0	1	0	0
Stratiomyidae_sp1	0	1	0	0
Stratiomyidae_sp2	0	1	0	0
Stratiomyidae_sp3	0	1	0	0
Ulidiidae_sp1	0	1	0	0
	0	1	0	0
Uroxys_sp1	215	0	0	0
Chrysomelidae_sp3	157	0	0	0
cf_Trichillum_sp1	123	0	0	0
Tenebrionidae_sp1	105	0	0	0
Canthon_sp1	93	0	0	0
Nitidulidae_sp2	53	0	0	0
Chrysomelidae_sp2	41	0	0	0
Mordellidae_sp5	33	0	0	0
Nitidulidae_sp5	25	0	0	0
Tenebrionidae_sp2	24	0	0	0
Bruchidae_sp2	21	0	0	0
Cleridae_sp3	17	0	0	0
Tenebrionidae_sp9	16	0	0	0
Curculionidae_sp5	14	0	0	0
Curculionidae_sp1	12	0	0	0
Elateridae_sp3	12	0	0	0
Anobiidae_sp3	10	0	0	0
Cleridae_sp2	10	0	0	0
Scydmaenidae_sp1	9	0	0	0
Anobiidae_sp4	8	0	0	0
Anobiidae_sp1	7	0	0	0
Chrysomelidae_sp5	7	0	0	0
Staphylinidae_sp1	7	0	0	0
Chrysomelidae_sp7	6	0	0	0
Coccinellidae_sp4	6	0	0	0
Curculionidae_sp13	6	0	0	0
Tenebrionidae_sp13	6	0	0	0
Cleridae_sp5	5	0	0	0
Dermestidae_sp1	5	0	0	0
Silvanidae_sp1	5	0	0	0
Staphylinidae_sp2	5	0	0	0
Bostrichidae_sp2	4	0	0	0
Cleridae_sp1	4	0	0	0
Curculionidae_sp10	4	0	0	0
Curculionidae_sp3	4	0	0	0
Elateridae_sp5	4	0	0	0
Histeridae_sp1	4	0	0	0
Mordellidae_sp2	4	0	0	0
Nitidulidae_sp1	4	0	0	0
Tenebrionidae_sp11	4	0	0	0
Tenebrionidae_sp4	4	0	0	0
Tenebrionidae_sp6	4	0	0	0
Tenebrionidae_sp8	4	0	0	0
Bostrichidae_sp3	3	0	0	0
Bostrichidae_sp4	3	0	0	0
Canthidium_sp1	3	0	0	0
Ceratocanthidae_sp1	3	0	0	0
Chrysomelidae_sp6	3	0	0	0
Corylophidae_sp1	3	0	0	0
Curculionidae_sp11	3	0	0	0
Curculionidae_sp2	3	0	0	0
Endomychidae_sp1	3	0	0	0
Erotylidae_sp1	3	0	0	0
Staphylinidae_sp10	3	0	0	0
Staphylinidae_sp9	3	0	0	0
Cerambycidae_sp1	2	0	0	0
Cerambycidae_sp2	2	0	0	0
Cerambycidae_sp4	2	0	0	0
Cerambycidae_sp5	2	0	0	0
Coccinellidae_sp5	2	0	0	0
Curculionidae_sp14	2	0	0	0
Curculionidae_sp15	2	0	0	0
Curculionidae_sp4	2	0	0	0
Lathridiidae_sp1	2	0	0	0
Melolonthidae_sp1	2	0	0	0
Mordellidae_sp1	2	0	0	0
Onthophagus_sp2	2	0	0	0
Phengodidae_sp1	2	0	0	0
Staphylinidae_sp11	2	0	0	0
Staphylinidae_sp3	2	0	0	0
Staphylinidae_sp6	2	0	0	0
Staphylinidae_sp7	2	0	0	0
Staphylinidae_sp8	2	0	0	0
Tenebrionidae_sp14	2	0	0	0
Tenebrionidae_sp5	2	0	0	0
Anthicidae_sp1	1	0	0	0
Aphodiinae_sp1	1	0	0	0
Bolboceratinae_sp1	1	0	0	0
Buprestidae_sp1	1	0	0	0
Canthon_sp2	1	0	0	0
Carabidae_sp1	1	0	0	0
Carabidae_sp2	1	0	0	0
Cassidinae_sp1	1	0	0	0
Cassidinae_sp2	1	0	0	0
Cassidinae_sp3	1	0	0	0
Cerambycidae_sp3	1	0	0	0
Cerambycidae_sp6	1	0	0	0
Chrysomelidae_sp1	1	0	0	0
Chrysomelidae_sp10	1	0	0	0
Chrysomelidae_sp9	1	0	0	0
Coccinellidae_sp1	1	0	0	0
Coccinellidae_sp2	1	0	0	0
Coccinellidae_sp3	1	0	0	0
Coccinellidae_sp7	1	0	0	0
Coccinellidae_sp8	1	0	0	0
Coccinellidae_sp9	1	0	0	0
Corylophidae_sp2	1	0	0	0
Curculionidae_sp12	1	0	0	0
Curculionidae_sp6	1	0	0	0
Curculionidae_sp7	1	0	0	0
Curculionidae_sp9	1	0	0	0
Dermestidae_sp2	1	0	0	0
Elateridae_sp1	1	0	0	0
Histeridae_sp2	1	0	0	0
Lampyridae_sp1	1	0	0	0
Megalopodidae_sp1	1	0	0	0
Meloidae_sp1	1	0	0	0
Meloidae_sp2	1	0	0	0
Mordellidae_sp3	1	0	0	0
Nitidulidae_sp3	1	0	0	0
Nitidulidae_sp4	1	0	0	0
Onthophagus_sp1	1	0	0	0
Pselaphidae_sp1	1	0	0	0
Silvanidae_sp2	1	0	0	0
Staphylinidae_sp12	1	0	0	0
Staphylinidae_sp4	1	0	0	0
Staphylinidae_sp5	1	0	0	0
Tenebrionidae_sp10	1	0	0	0
Tenebrionidae_sp12	1	0	0	0
Tenebrionidae_sp15	1	0	0	0
Tenebrionidae_sp7	1	0	0	0
Trogossitidae_sp2	1	0	0	0
Trogossitidae_sp3	1	0	0	0
Uroxys_sp2	1	0	0	0
Uroxys_sp3	1	0	0	0
Aradidae_sp1	0	0	8	0
Cercopidae_sp3	0	0	1	0
Cicadellidae_sp1	0	0	1	0
Cicadellidae_sp10	0	0	1	0
Cicadellidae_sp11	0	0	3	0
Cicadellidae_sp12	0	0	1	0
Cicadellidae_sp13	0	0	1	0
Cicadellidae_sp2	0	0	3	0
Cicadellidae_sp3	0	0	2	0
Cicadellidae_sp4	0	0	4	0
Cicadellidae_sp5	0	0	2	0
Cicadellidae_sp6	0	0	4	0
Cicadellidae_sp7	0	0	1	0
Cicadellidae_sp8	0	0	1	0
Cicadellidae_sp9	0	0	25	0
Cydnidae_sp1	0	0	10	0
Cydnidae_sp2	0	0	1	0
Delphacidae_sp1	0	0	5	0
Delphacidae_sp2	0	0	1	0
Dictyopharidae_sp1	0	0	1	0
Embioptera_sp1	0	0	0	0
Hemerobiidae_sp1	0	0	0	0
Homoptera_sp1	0	0	1	0
Isotomidae_sp1	0	0	0	0
Isotomidae_sp2	0	0	0	0
Lygaeidae_sp1	0	0	2	0
Lygaeidae_sp2	0	0	1	0
Lygaeidae_sp3	0	0	1	0
Membracidae_sp1	0	0	1	0
Membracidae_sp2	0	0	1	0
Membracidae_sp3	0	0	1	0
Miridae_sp3	0	0	1	0
Miridae_sp4	0	0	1	0
Miridae_sp5	0	0	4	0
Nicoletiidae_sp1	0	0	0	0
Pentatomidae_sp1	0	0	1	0
Ploiariidae_sp1	0	0	1	0
Pyrrhocoridae_sp1	0	0	1	0
Reduvidae_sp2	0	0	1	0
Tingidae_sp1	0	0	21	0
Tingidae_sp2	0	0	5	0

## Sheet: Q2_Morpho
Morfo	Coleoptera		Morfo	Diptera		Morfo	Hymenoptera
Uroxys_sp1	215		Piophilidae_sp1	85		Monomorium_sp1	219
Chrysomelidae_sp3	157		Dolichopodidae_sp1	66		Ectatoma_ruidum	141
cf_Trichillum_sp1	123		Muscidae_sp5	17		Cephalotes_sp3	120
Tenebrionidae_sp1	105		Drosophilidae_sp1	15		Cephalotes_sp4	87
Canthon_sp1	93		Phoridae_sp1	14		Solenopsis_sp1	83
			Micropezidae_sp1	12		Cramatogaster_sp1	65
						Dolichoderus_sp1	65
						Acromyrmex_sp1	51

## Sheet: Sheet3
Family	Fogging	Malaise	Pitfall
Acanthopidae	0	0	1
Formicidae	0	0	51
Agromyzidae	0	1	0
Ampulicidae	0	1	0
Anisopodidae	0	1	0
Anobiidae	0	7	0
Anobiidae	3	7	0
Anobiidae	7	1	0
Formicidae	0	0	1
Anthicidae	0	1	0
Anthomyiidae	0	1	0
Aphodiinae	0	0	1
Apidae	0	2	0
Apidae	0	7	0
Apidae	0	0	1
Apoidea	0	1	0
Apoidea	0	1	0
Apoidea	0	3	0
Apoidea	0	2	0
Aradidae	0	0	8
Asilidae	0	2	0
Asilidae	0	3	0
Asilidae	0	1	0
Aslidae	0	1	0
Aslidae	0	1	0
Blattellidae	0	0	1
Blattellidae	0	0	3
Blattellidae	0	1	1
Blattidae	0	0	3
Bolboceratidae	0	0	1
Bostrichidae	0	4	0
Bostrichidae	1	2	0
Bostrichidae	2	1	0
Formicidae	0	0	5
Braconidae	2	0	0
Braconidae	2	0	0
Braconidae	2	0	0
Braconidae	1	0	0
Braconidae	1	0	0
Braconidae	3	0	0
Braconidae	3	0	0
Braconidae	1	0	0
Braconidae	0	18	0
Braconidae	0	8	0
Braconidae	0	11	0
Braconidae	0	1	0
Braconidae	0	3	0
Braconidae	0	1	0
Bradynobaenidae	0	3	0
Bruchidae	0	20	1
Buprestidae	1	0	0
Calliphoridae	0	0	1
Calliphoridae	0	2	0
Calliphoridae	0	3	0
Formicidae	0	0	1
Formicidae	3	1	0
Formicidae	0	5	1
Formicidae	3	1	2
Formicidae	3	0	0
Formicidae	0	24	0
Formicidae	0	9	2
Canacidae	0	1	0
Scarabaeidae	0	0	3
Scarabaeidae	0	0	93
Scarabaeidae	0	0	1
Carabidae	0	0	1
Carabidae	0	1	0
Cassidinae	0	1	0
Cassidinae	1	0	0
Cassidinae	1	0	0
Cecidomyiidae	0	1	0
Formicidae	0	1	0
Formicidae	0	0	1
Formicidae	0	1	0
Formicidae	106	12	2
Formicidae	65	22	0
Formicidae	1	2	0
Cephidae	0	1	0
Cerambycidae	0	2	0
Cerambycidae	0	2	0
Cerambycidae	0	1	0
Cerambycidae	2	0	0
Cerambycidae	0	2	0
Cerambycidae	1	0	0
Ceratocanthidae	0	0	3
Ceratopogonidae	0	1	0
Cercopidae	0	1	0
Scarabaeidae	0	0	123
Chalcidoidea	1	0	0
Chalcidoidea	1	0	0
Chalcidoidea	1	0	0
Chalcidoidea	1	0	0
Chalcidoidea	0	1	0
Chalcidoidea	0	1	0
Chalcidoidea	0	1	0
Chalcidoidea	0	1	0
Chalcidoidea	0	2	0
Chalcidoidea	0	1	0
Chalcidoidea	0	1	0
Chalcidoidea	0	1	0
Chalcidoidea	0	1	0
Chalcidoidea	0	1	0
Chamaemyiidae	0	3	0
Chironomidae	0	2	0
Chironomidae	0	1	0
Chironomidae	0	1	0
Chloropidae	0	7	1
Chloropidae	0	10	0
Chloropidae	0	1	0
Chloropidae	0	2	0
Chloropidae	0	1	0
Chrysidinae	0	1	0
Chrysidoidea	0	2	0
Chrysidoidea	0	1	0
Chrysidoidea	0	1	0
Chrysidoidea	0	1	0
Chrysidoidea	0	1	0
Chrysidoidea	0	1	0
Chrysidoidea	0	1	0
Chrysidoidea	0	1	0
Chrysidoidea	0	1	0
Chrysidoidea	0	15	0
Chrysidoidea	0	1	0
Chrysidoidea	0	2	0
Chrysidoidea	0	1	0
Chrysidoidea	0	1	0
Chrysidoidea	0	1	0
Chrysidoidea	0	3	0
Chrysidoidea	0	1	0
Chrysomelidae	0	0	1
Chrysomelidae	1	0	0
Chrysomelidae	0	40	1
Chrysomelidae	119	37	1
Chrysomelidae	3	4	0
Chrysomelidae	0	3	0
Chrysomelidae	0	6	0
Chrysomelidae	0	1	0
Cicadellidae	0	0	1
Cicadellidae	0	1	0
Cicadellidae	1	2	0
Cicadellidae	0	1	0
Cicadellidae	1	0	0
Cicadellidae	0	3	0
Cicadellidae	0	2	0
Cicadellidae	0	4	0
Cicadellidae	0	2	0
Cicadellidae	0	4	0
Cicadellidae	0	1	0
Cicadellidae	0	1	0
Cicadellidae	25	0	0
Cleridae	0	3	1
Cleridae	0	10	0
Cleridae	0	17	0
Cleridae	0	5	0
Clusiidae	0	1	0
Coccinellidae	0	1	0
Coccinellidae	0	1	0
Coccinellidae	0	1	0
Coccinellidae	0	6	0
Coccinellidae	1	1	0
Coccinellidae	1	0	0
Coccinellidae	1	0	0
Coccinellidae	0	1	0
Colletidae	0	1	0
Conopidae	0	1	0
Conopidae	0	1	0
Corylophidae	2	1	0
Corylophidae	1	0	0
Crabronidae	0	3	0
Crabronidae	0	1	0
Cramatogaster	39	23	3
Crematogaster	0	9	0
Curculionidae	0	0	12
Curculionidae	0	4	0
Curculionidae	2	1	0
Curculionidae	0	1	0
Curculionidae	6	0	0
Curculionidae	2	0	0
Curculionidae	0	0	2
Curculionidae	0	0	3
Curculionidae	0	0	4
Curculionidae	1	0	1
Curculionidae	0	4	10
Curculionidae	0	0	1
Curculionidae	0	0	1
Curculionidae	0	1	0
Curtonotidae	0	1	0
Curtonotidae	0	1	0
Curtonotidae	0	2	0
Cydnidae	0	2	8
Cydnidae	0	1	0
Cynipoidea	0	1	0
Delphacidae	4	0	1
Delphacidae	0	1	0
Dermestidae	1	4	0
Dermestidae	1	0	0
Dictyopharidae	1	0	0
Diptera sp1	0	0	1
Formicidae	64	0	1
Formicidae	0	2	0
Dolichopodidae	0	66	0
Dolichopodidae	0	1	0
Dolichopodidae	0	3	0
Dolichopodidae	0	10	0
Dolichopodidae	0	1	0
Dolichopodidae	0	2	0
Drosophilidae	1	14	0
Drosophilidae	0	1	0
Formicidae	1	0	140
Elateridae	0	0	1
Elateridae	0	12	0
Elateridae	0	4	0
Embioptera	0	0	1
Empididae	0	1	0
Empididae	0	2	0
Endomychidae	0	0	3
Erotylidae	0	3	0
Eucharitidae	0	1	0
Evaniidae	0	1	0
Evaniidae	0	7	0
Evaniidae	0	4	0
Formicidae	0	0	1
Formicidae	0	0	1
Gryllacrididae	0	1	0
Gryllidae	0	0	1
Gryllidae	0	0	1
Hemerobiidae	0	1	0
Histeridae	0	0	4
Histeridae	1	0	0
Homoptera	1	0	0
Ichneumonidae	0	9	1
Ichneumonidae	0	2	0
Ichneumonidae	0	1	0
Isotomidae	0	0	1
Isotomidae	0	0	2
Lampyridae	1	0	0
Lathridiidae	0	2	0
Lauxaniidae	0	1	0
Lauxaniidae	0	1	0
Lauxaniidae	0	4	0
Formicidae	0	1	0
Lonchaeidae	0	1	0
Lygaeidae	0	2	0
Lygaeidae	0	0	1
Lygaeidae	0	0	1
Mantidae	1	0	0
Mantidae	2	0	0
Megalopodidae	0	1	0
Meloidae	0	1	0
Meloidae	0	1	0
Melolonthidae	0	2	0
Membracidae	0	1	0
Membracidae	0	1	0
Membracidae	1	0	0
Mesembrinellidae	0	2	0
Micropezidae	0	12	0
Micropezidae	0	2	0
Milichiidae	0	2	0
Miridae	1	0	0
Miridae	1	0	0
Miridae	4	0	0
Formicidae	170	47	2
Mordellidae	0	2	0
Mordellidae	0	4	0
Mordellidae	0	1	0
Mordellidae	0	33	0
Muscidae	0	0	1
Muscidae	0	1	0
Muscidae	0	1	0
Muscidae	0	2	0
Muscidae	0	17	0
Muscidae	0	1	0
Muscidae	0	2	0
Muscidae	0	1	0
Muscidae	0	1	0
Mutillidae	0	0	2
Mutillidae	0	3	0
Mutillidae	0	0	1
Formicidae	0	0	15
Mycetophilidae	0	0	1
Mycetophilidae	0	7	0
Nicoletiidae	0	0	1
Nitidulidae	0	0	4
Nitidulidae	0	4	49
Nitidulidae	0	1	0
Nitidulidae	0	1	0
Nitidulidae	0	11	14
Formicidae	0	2	0
Formicidae	0	0	12
Formicidae	0	0	8
Scarabaeidae	0	0	1
Scarabaeidae	0	0	2
Orthoptero	0	0	1
Formicidae	0	0	9
Pentatomidae	0	1	0
Formicidae	0	0	5
Phengodidae	0	2	0
Phoridae	1	0	0
Phoridae	0	9	5
Phoridae	0	0	1
Phoridae	0	0	1
Phoridae	0	2	0
Phoridae	0	6	0
Phoridae	0	3	0
Phoridae	0	1	0
Piophilidae	0	84	1
Piophilidae	0	4	0
Piophilidae	0	1	0
Platygastroidea	0	1	0
Platygastroidea	0	1	0
Platygastroidea	0	1	0
Ploiariidae	1	0	0
Pompilidae	0	0	1
Pompilidae	0	1	0
Pompilidae	0	3	0
Proctotrupoidea	0	6	0
Proctotrupoidea	0	1	0
Proctotrupoidea	0	3	0
Proctotrupoidea	0	1	0
Proctotrupoidea	0	2	0
Proctotrupoidea	0	1	0
Pselaphidae	0	1	0
Formicidae	1	1	5
Formicidae	0	11	0
Formicidae	0	1	0
Formicidae	0	5	0
Formicidae	0	9	0
Formicidae	32	1	0
Formicidae	0	4	0
Psocoptera	3	1	0
Psocoptera	1	0	0
Psocoptera	31	0	0
Psocoptera	14	0	0
Psocoptera	1	0	0
Psocoptera	1	0	0
Psocoptera	26	1	0
Psocoptera	7	0	0
Psocoptera	1	0	0
Psychodidae	0	1	0
Psychodidae	0	1	0
Pyrrhocoridae	0	0	1
Reduvidae	1	0	0
Formicidae	0	0	1
Ropalomeridae	0	1	0
Sapygidae	0	1	0
Sarcophagidae	0	8	0
Sarcophagidae	0	1	0
Sarcophagidae	0	3	0
Sciaridae	0	2	0
Scoliidae	0	7	0
Scydmaenidae	0	5	4
Silvanidae	0	0	5
Silvanidae	0	1	0
Formicidae	0	0	83
Sphaeroceridae	0	3	0
Sphaeroceridae	0	1	0
Sphaeroceridae	0	1	0
Sphaeroceridae	0	1	0
Sphaeroceridae	0	1	0
Staphylinidae	0	6	1
Staphylinidae	0	3	0
Staphylinidae	0	2	0
Staphylinidae	0	0	1
Staphylinidae	0	1	4
Staphylinidae	0	1	1
Staphylinidae	0	0	1
Staphylinidae	0	0	1
Staphylinidae	0	2	0
Staphylinidae	0	2	0
Staphylinidae	0	2	0
Staphylinidae	0	3	0
Stratiomyidae	0	1	0
Stratiomyidae	0	1	0
Stratiomyidae	0	1	0
Formicidae	1	0	0
Tabanidae	0	11	0
Formicidae	0	0	1
Tenebrionidae	0	0	105
Tenebrionidae	0	1	0
Tenebrionidae	0	4	0
Tenebrionidae	0	1	0
Tenebrionidae	0	6	0
Tenebrionidae	0	2	0
Tenebrionidae	0	1	0
Tenebrionidae	0	0	24
Tenebrionidae	0	0	4
Tenebrionidae	0	0	2
Tenebrionidae	0	0	4
Tenebrionidae	0	0	1
Tenebrionidae	0	4	0
Tenebrionidae	0	13	3
Tettigonidae	0	5	0
Thespidae	0	1	0
Thespidae	5	0	0
Tingidae	21	0	0
Tingidae	5	0	0
Tiphiidae	0	1	0
Tiphiidae	0	1	0
Tiphiidae	0	1	0
Tiphiidae	0	1	0
Tiphiidae	0	7	0
Trogossitidae	0	1	0
Trogossitidae	0	1	0
Ulidiidae	0	1	0
Scarabaeidae	0	4	211
Scarabaeidae	0	0	1
Scarabaeidae	0	0	1
Vespidae	0	2	0
Vespidae	0	6	0
Vespidae	0	9	0
Vespidae	0	1	0
Vespidae	0	14	0
Vespidea	0	3	0

## Sheet: Sheet4
Row Labels	Sum Fogging	Sum Malaise	Sum Pitfall
Acanthopidae	0	0	1
Agromyzidae	0	1	0
Ampulicidae	0	1	0
Anisopodidae	0	1	0
Anobiidae	10	15	0
Anthicidae	0	1	0
Anthomyiidae	0	1	0
Aphodiinae	0	0	1
Apidae	0	9	1
Apoidea	0	7	0
Aradidae	0	0	8
Asilidae	0	6	0
Aslidae	0	2	0
Blattellidae	0	1	5
Blattidae	0	0	3
Bolboceratidae	0	0	1
Bostrichidae	3	7	0
Braconidae	15	42	0
Bradynobaenidae	0	3	0
Bruchidae	0	20	1
Buprestidae	1	0	0
Calliphoridae	0	5	0
Calliphoridae	0	0	1
Canacidae	0	1	0
Carabidae	0	1	1
Cassidinae	2	1	0
Cecidomyiidae	0	1	0
Cephidae	0	1	0
Cerambycidae	3	7	0
Ceratocanthidae	0	0	3
Ceratopogonidae	0	1	0
Cercopidae	0	1	0
Chalcidoidea	4	11	0
Chamaemyiidae	0	3	0
Chironomidae	0	4	0
Chloropidae	0	21	1
Chrysidinae	0	1	0
Chrysidoidea	0	35	0
Chrysomelidae	123	91	3
Cicadellidae	27	21	1
Cleridae	0	35	1
Clusiidae	0	1	0
Coccinellidae	3	11	0
Colletidae	0	1	0
Conopidae	0	2	0
Corylophidae	3	1	0
Crabronidae	0	4	0
Cramatogaster	39	23	3
Crematogaster	0	9	0
Curculionidae	11	11	34
Curtonotidae	0	4	0
Cydnidae	0	3	8
Cynipoidea	0	1	0
Delphacidae	4	1	1
Dermestidae	2	4	0
Dictyopharidae	1	0	0
Diptera sp1	0	0	1
Dolichopodidae	0	83	0
Drosophilidae	1	15	0
Elateridae	0	16	1
Embioptera	0	0	1
Empididae	0	3	0
Endomychidae	0	0	3
Erotylidae	0	3	0
Eucharitidae	0	1	0
Evaniidae	0	12	0
Formicidae	450	162	350
Gryllacrididae	0	1	0
Gryllidae	0	0	2
Hemerobiidae	0	1	0
Histeridae	1	0	4
Homoptera	1	0	0
Ichneumonidae	0	12	1
Isotomidae	0	0	3
Lampyridae	1	0	0
Lathridiidae	0	2	0
Lauxaniidae	0	6	0
Lonchaeidae	0	1	0
Lygaeidae	0	2	2
Mantidae	3	0	0
Megalopodidae	0	1	0
Meloidae	0	2	0
Melolonthidae	0	2	0
Membracidae	1	2	0
Mesembrinellidae	0	2	0
Micropezidae	0	14	0
Milichiidae	0	2	0
Miridae	6	0	0
Mordellidae	0	40	0
Muscidae	0	26	1
Mutillidae	0	3	3
Mycetophilidae	0	7	1
Nicoletiidae	0	0	1
Nitidulidae	0	17	67
Orthoptero	0	0	1
Pentatomidae	0	1	0
Phengodidae	0	2	0
Phoridae	1	21	7
Piophilidae	0	89	1
Platygastroidea	0	3	0
Ploiariidae	1	0	0
Pompilidae	0	4	1
Proctotrupoidea	0	14	0
Pselaphidae	0	1	0
Psocoptera	85	2	0
Psychodidae	0	2	0
Pyrrhocoridae	0	0	1
Reduvidae	1	0	0
Ropalomeridae	0	1	0
Sapygidae	0	1	0
Sarcophagidae	0	12	0
Scarabaeidae	0	4	436
Sciaridae	0	2	0
Scoliidae	0	7	0
Scydmaenidae	0	5	4
Silvanidae	0	1	5
Sphaeroceridae	0	7	0
Staphylinidae	0	22	9
Stratiomyidae	0	3	0
Tabanidae	0	11	0
Tenebrionidae	0	32	143
Tettigonidae	0	5	0
Thespidae	5	1	0
Tingidae	26	0	0
Tiphiidae	0	11	0
Trogossitidae	0	2	0
Ulidiidae	0	1	0
Vespidae	0	32	0
Vespidea	0	3	0
(blank)
Grand Total	834	1174	1127

[truncated: 2 more sheets: GuildByMsp, GuildSummary]
